1 Transcriptome changes in chlorsulfuron-treated plants are caused by  
2 acetolactate synthase inhibition and not induction of a herbicide  
3 detoxification system in *Marchantia polymorpha*

4

5 Alexandra Casey<sup>1,2</sup>, Thomas Köcher<sup>3</sup>, Samuel Caygill<sup>1,2</sup>, Clément Champion<sup>1</sup>, Clémence Bonnot<sup>1</sup>, Liam  
6 Dolan<sup>1,2\*</sup>

7

8 1. Department of Biology, University of Oxford, Oxford OX1 3RB, United Kingdom

9 2. Gregor Mendel Institute, Dr. Bohr-Gasse, 3, Vienna 1030, Austria

10 3. Vienna BioCenter Core Facilities GmbH, Dr. Bohr-Gasse 3, Vienna 1030, Austria

11

12 \*Corresponding author

13 Liam.Dolan@gmi.oeaw.ac.at

14

15

16

17

18

## 19 Abstract

20 A sensing mechanism in mammals perceives xenobiotics and induces the transcription of genes  
21 encoding proteins that detoxify these molecules. However, it is unclear if plants sense xenobiotics,  
22 and activate an analogous signalling system leading to their detoxification. Using the liverwort  
23 *Marchantia polymorpha*, we tested the hypothesis that there is a sensing system in plants that  
24 perceives herbicides resulting in the increased transcription of genes encoding proteins that detoxify  
25 these herbicides. Consistent with the hypothesis, we show that chlorsulfuron-treatment induces  
26 changes in the *M. polymorpha* transcriptome. However, these transcriptome changes do not occur  
27 in chlorsulfuron (CS)-treated target site resistant mutants, where the gene encoding the target  
28 carries a mutation that confers resistance to chlorsulfuron. Instead, we show that inactivation of the  
29 chlorsulfuron target, acetolactate synthase (ALS) (also known as acetoxyacid synthase (AHAS)),  
30 is required for the transcriptome response. These data are consistent with the changes in the  
31 transcriptome of chlorsulfuron-treated plants being caused by disrupted amino acid synthesis and  
32 metabolism resulting from acetolactate synthase inhibition. These conclusions suggest that  
33 chlorsulfuron is not sensed in *M. polymorpha* leading to induce a detoxification system.

34

## 35 Author Summary

36 Herbicide use is increasing throughout the world, however we know little about how plants respond  
37 to herbicide treatment and regulate their metabolism. Some plants have evolved resistance to  
38 herbicides such as chlorsulfuron by increasing the detoxification of the herbicide compared to  
39 sensitive plants. It has been suggested that plants can directly sense the herbicide chemical which  
40 activates a detoxification response, in a similar way to the detoxification of foreign chemicals in  
41 mammalian cells. The liverwort *Marchantia polymorpha* is an excellent system to study plant  
42 herbicide responses due to its short generation time, ease of propagation and low genetic

43 redundancy. We show that chlorsulfuron treatment alters the expression of many genes in *M.*  
44 *polymorpha*, however plants with a resistance-conferring mutation in the molecular target of  
45 chlorsulfuron do not show any changes in gene expression in response to chlorsulfuron treatment.  
46 This result indicates that transcriptome changes caused by chlorsulfuron depend on the inhibition of  
47 the target by chlorsulfuron. This suggests that plants do not sense chlorsulfuron and activate a  
48 detoxification system. This finding has implications for herbicide use and discovery.

49

## 50 Introduction

51 In mammals, sensing mechanisms detect the presence of xenobiotics which in turn activate a  
52 signalling system that induces the expression of genes that encode proteins that function in their  
53 metabolism (1,2). Genes induced by exposure to xenobiotics include those encoding cytochrome  
54 P450 monooxygenases that oxidize substrates, making them more polar, which in the case of  
55 xenobiotics can make them available for metabolism and inactivation (3). Genes encoding  
56 cytochrome P450 monooxygenases are also transcriptionally induced – along with many other genes  
57 – in plants treated with herbicides (4–19). Furthermore, transcriptional changes of genes encoding  
58 cytochrome P450 monooxygenases have also been shown to confer resistance to herbicides in  
59 herbicide-resistant weeds (14,20–25). Consequently, it has been hypothesized that a sensing  
60 mechanism exists in plants that induces the transcription of genes encoding enzymes that detoxify  
61 herbicides (26,27). An alternative hypothesis is that the detoxification of herbicides in plants is not  
62 activated by a herbicide sensing mechanism.

63 Chlorsulfuron is a member of the hydroxyurea family of herbicides that are active against a  
64 wide range of weeds including members of the *Poaceae* (grasses) and eudicots (broad leaf plants).  
65 Its target is the enzyme acetolactate synthase (ALS) which functions in the first committed step in  
66 the branch chain amino acid pathway (28,29). ALS catalyses the reaction between acetate and  
67 pyruvate to produce 2-acetolactate a precursor of valine and leucine. It also catalyses the reaction

68 between acetate and 2-hydroxybutyrate to form 2-aceto-2-hydroxybutyrate, a precursor of leucine.  
69 Treatment of plants with chlorsulfuron and other ALS inhibitors results in a reduction in levels of  
70 branched chain amino acids in a variety of plants (30–36). However, it is unclear what causes plant  
71 death following treatment with ALS inhibitors. It is likely that reduced levels of branched chain  
72 amino acids contribute, but it is possible that secondary catastrophic effects that result from ALS  
73 inhibition are responsible for death.

74 Resistance to chlorsulfuron has evolved in the field in response to the intense selection  
75 pressure imposed by herbicide treatment (37–39). Two types of resistance have evolved to  
76 chlorsulfuron; target site resistance (TSR) and non-target site resistance (NTSR). Target site  
77 resistance results from mutations that cause amino acid substitutions in the channel of the ALS  
78 protein leading to the active site (40). It has been shown by solving the crystal structure of the *A.*  
79 *thaliana* ALS enzyme in complex with ALS-inhibiting herbicides that these mutations change the  
80 shape of the channel and block access of the herbicide to the active site (40). Codons of several  
81 amino acids in the channel region mutate to cause TSR (37). For example, a resistance-conferring  
82 mutation that is frequently found in resistant weeds is at the codon encoding a conserved proline  
83 (P197) (41–43). Non-target site resistance has evolved in weeds in the field and has been shown to  
84 result from higher levels of expression of genes encoding enzymes such as cytochrome P450s  
85 (14,44). It is hypothesized that the high levels of expression of these enzymes can chemically modify  
86 the herbicide making it inactive and or more susceptible to degradation than in wild-type.

87 To determine if plants sense herbicides we characterized the response of the model plant *M.*  
88 *polymorpha* to chlorsulfuron treatment. Our data are consistent with the hypothesis that  
89 chlorsulfuron acts by inhibiting acetolactate synthase. We show chlorsulfuron-treatment changes  
90 the transcriptome. However, we demonstrate that the transcriptome changes caused by  
91 chlorsulfuron-treatment are not induced in plants harbouring a mutant form of ALS that cannot bind  
92 to chlorsulfuron. Therefore, the presence of chlorsulfuron alone is not sufficient to induce the

93 transcriptome change. We predict transcriptome changes induced by chlorsulfuron are not involved  
94 in detoxification but result from the physiological changes to the plant caused by the inhibition of  
95 the chlorsulfuron target. We test this hypothesis and demonstrate that ectopic overexpression of  
96 three cytochrome P450 monooxygenase and glutathione transferase encoding genes do not increase  
97 chlorsulfuron resistance. These data suggest that a xenobiotic-sensing mechanism – analogous to  
98 the sensing system in mammals – that senses chlorsulfuron, does not exist in *M. polymorpha*.

99

## 100 Results

### 101 Chlorsulfuron represses the growth of *Marchantia polymorpha*

102 Since some herbicides do not effectively control *M. polymorpha*, we first tested if chlorsulfuron was  
103 potent against this liverwort (45,46). To determine if chlorsulfuron (CS) represses the growth of *M.*  
104 *polymorpha*, Tak-2 (wild-type female) gemmae were plated on solid nutrient media for 7 days and  
105 transferred to media containing different concentrations of chlorsulfuron and grown in light for a  
106 further 7 days. To quantify gemmaling growth, thallus area was calculated when imaged from above.  
107 The data indicate that chlorsulfuron represses the growth of *M. polymorpha* in a dose dependent  
108 manner. The concentration at which plant growth is inhibited by 50% (GR<sub>50</sub>) was 3.3 nM (SD = 0.5)  
109 and the lethal dose was estimated to be 300 nM (Fig 1A). These data demonstrate that chlorsulfuron  
110 has herbicidal activity on *M. polymorpha* and represses growth in the nM concentration range.

111

#### 112 Fig 1. Chlorsulfuron represses the growth of *Marchantia polymorpha*

113 (A) Dose response curve of the growth of 14-day old Tak-2 gemmae after seven days on CS-treated  
114 medium. Data plotted with a non-linear fit, sigmoidal, four-parameter regression curve. N=5-10.

115 Error bars are ± SD.

116 **(B)** Targeted metabolic analysis showing the accumulation of valine, leucine and isoleucine,  
117 tryptophan, and isopropylmalate in untreated Tak-2 plants and in plants treated with 100 nM CS.  
118 Plants were grown for 11 days, transferred to treatment plates for 24 h, then extracted. Extracts  
119 were analysed using a targeted approach by LC-MS/MS. Statistical significance based on Student's t-  
120 test between treatment groups for each metabolite. \* =  $p < 0.05$ , \*\* =  $p < 0.01$ , \*\*\* =  $p < 0.001$ , n.s. =  
121 not significant. N=6 except in isoleucine untreated group n=5 (one outlier was removed). Box and  
122 whisker plot where whiskers are first and fourth quartiles, boxes represent second and third  
123 quartiles, and the horizontal line is the median.

124 **(C)** 14-day old Tak-2 gemmae grown from day 0 on medium supplemented with 800  $\mu$ M branched  
125 chain amino acids and/or 100 nM CS then imaged using NightOwl imaging system which measures  
126 chlorophyll autofluorescence. Plant area ( $\text{mm}^2$ ) was measured using indiGo software. Statistical  
127 significance based on Kruskal-Wallis test, with groups determined by Nemenyi post-hoc test. Box  
128 and whisker plot where whiskers are first and fourth quartiles, boxes represent second and third  
129 quartiles, and the horizontal line is the mean.

130

131 Inhibition of ALS by chlorsulfuron has been shown to block the biosynthesis of branched  
132 chain amino acids in several organisms including bacteria and flowering plants (30–36). To test the  
133 hypothesis that chlorsulfuron has the same mode of action in *M. polymorpha* as in other organisms,  
134 we determined the impact of chlorsulfuron-treatment on the levels of branched chain amino acids.  
135 Plants were grown from gemmae for 11 days in constant light and then transferred to solid media  
136 containing 100 nM chlorsulfuron or untreated media for 24 hours. Plants were harvested and small  
137 molecules were extracted and separated by liquid chromatography before detection with mass  
138 spectroscopy. The levels of the branched chain amino acids valine and leucine were significantly  
139 lower in treated plants than in untreated controls. Valine accumulated to approximately 725,000  
140 ions (SD = 180,000) in chlorsulfuron-treated plants compared to untreated control where the amino

141 acid accumulated to 2,310,000 ions (SD = 600,000) (Fig 1B). Leucine accumulated to 1,240,000 ions  
142 (SD = 190,000) in chlorsulfuron-treated plants compared to untreated control where the amino acid  
143 accumulated to 2,580,000 ions (SD = 890,000). There was no significant difference in the amount of  
144 isoleucine between the chlorsulfuron-treated and untreated plants. These data are consistent with  
145 the hypothesis that chlorsulfuron blocks the activity of the ALS enzyme, the first committed step in  
146 branched chain amino acid synthesis, leading to a reduction of branched chain amino acids in the  
147 plant.

148 To independently test if chlorsulfuron acts by repressing branched chain amino acid  
149 synthesis, we tested if the lethality caused by chlorsulfuron-treatment could be suppressed by  
150 growing plants in media supplemented with branched chain amino acids. Growing plants in 100 nM  
151 chlorsulfuron entirely inhibited growth while untreated controls grew to a mean area of 33.5 (SD =  
152 18.4) mm<sup>2</sup> (Fig 1C). Growing plants in the presence of 100 nM chlorsulfuron and supplemented with  
153 800 μM valine, leucine and isoleucine restored growth to 12.6 (SD = 7.2) mm<sup>2</sup>. The suppression of  
154 the chlorsulfuron-inhibition of growth by branched chain amino acid supplementation is consistent  
155 with the hypothesis that chlorsulfuron-treatment blocks the synthesis of branched chain amino acids  
156 by inhibiting ALS activity. These data suggest that that the inhibition of growth by chlorsulfuron is, at  
157 least in part, the result of a depletion in the pool of branched chain amino acids in chlorsulfuron-  
158 treated plants.

159 Together these data are consistent with the hypothesis that chlorsulfuron inhibits *M.*  
160 *polymorpha* growth by inhibiting branched chain amino acid biosynthesis as it does in other  
161 organisms.

162

## 163 The *ALS* P197 mutation confers resistance to chlorsulfuron

164 If *ALS* is the target of chlorsulfuron in *M. polymorpha*, we hypothesized that mutations in codons  
165 that encode amino acids important to chlorsulfuron binding could confer resistance to the herbicide.  
166 To identify mutations that confer resistance to chlorsulfuron we mutated  $10^6$  spores with UV  
167 radiation, grew the spores on chlorsulfuron, and selected resistant mutants after 14 days of growth  
168 in light. We selected two independent mutants that were morphologically similar to wild-type and  
169 verified their resistance by growing gemmae from each on 140 nM chlorsulfuron; both mutants grew  
170 while wild-type plants died.

171           Once chlorsulfuron-resistance was verified, we isolated DNA from each of the two lines and  
172 sequenced the *MpALS* gene using Sanger sequencing. There was a mutation at the codon for a  
173 proline at amino acid position 197 of *A. thaliana* *ALS* (position 207 of *M. polymorpha* *ALS* protein  
174 sequence) in each mutant that resulted in a P197L change in each (Fig 2A, B). P197 was unchanged in  
175 wild-type parental lines. The presence of the P197L mutations in *MpALS* in both chlorsulfuron-  
176 resistant mutants is consistent with the hypothesis that chlorsulfuron acts by binding to *MpALS*.  
177 Mutants were designated *Mpacetolactate synthase*<sup>chlorsulfuronresistantP197L</sup> (*Mpals*<sup>csP197L\_7</sup>) and  
178 *Mpals*<sup>csP197L\_10</sup> respectively.

179

### 180 **Fig 2. The P197L mutation in *MpALS* confers resistance to chlorsulfuron.**

181 **(A)** Diagram of the *MpALS* gene showing the location of the mutation in *MpALS* identified in lines  
182 *Mpals*<sup>csP197L\_7</sup> and *Mpals*<sup>csP197L\_10</sup> (arrow head). Untranslated regions (grey), exons (yellow).

183 **(B)** Alignment of the sequenced region of *MpALS* showing the cysteine to thymine mutation which is  
184 predicted to cause an amino acid change of a proline to a leucine at amino acid position 197 of *AtALS*  
185 (position 207 in *MpALS*).



186 **(C) Growth assay of wild-type Tak-2, *Mpals*<sup>csP197L\_7</sup> and *Mpals*<sup>csP197L\_10</sup> lines grown on different**  
187 concentrations of CS. Error bars are  $\pm$  SD. N=5-10. GR<sub>50</sub> is the herbicide concentration that causes a  
188 50% reduction in growth. Resistance index (RI) = GR<sub>50</sub> (Resistant line)/GR<sub>50</sub> (Tak-2).

189

190 To quantify the degree of resistance of *Mpals*<sup>csP197L\_7L</sup> and *Mpals*<sup>csP197L\_10</sup> mutant and wild-type  
191 plants were grown on media containing different concentrations of chlorsulfuron. The GR<sub>50</sub> values of  
192 *Mpals*<sup>csP197L\_7</sup> and *Mpals*<sup>csP197L\_10</sup> were 771.9 nM (SD = 89.2) and 363.9 nM (SD = 77.4) respectively (Fig  
193 2C). This was more than two orders of magnitude greater than wild-type which was 3.4 nM (SD =  
194 1.0). While the lethal dose of chlorsulfuron for wild-type was 300 nM, we were unable to detect a  
195 lethal dose for the mutants in this experiment because mutant plants grew at the highest  
196 concentrations of chlorsulfuron applied (3  $\mu$ M). Such high levels of resistance in mutants compared  
197 to wild-type is typical for mutations that alter the binding of the herbicide to its target (41,47,48).

198 The demonstration that mutations at the proline 197 codon confer resistance to  
199 chlorsulfuron is consistent with chlorsulfuron inhibiting ALS function in *M. polymorpha*.

200

201 ***Mpacetolactate synthase (Mpals)* complete loss of function mutants**  
202 **are lethal and are rescued by branched chain amino acid supplements**

203 We demonstrate that the P197L mutation in MpALS confers resistance to chlorsulfuron and the  
204 lethality of chlorsulfuron in treated plants can be rescued with branched chain amino acids. This is  
205 consistent with ALS being the target of chlorsulfuron in *M. polymorpha*. Since ALS inhibition is lethal  
206 in *M. polymorpha*, we hypothesized that mutations in MpALS leading to a complete loss of ALS  
207 activity would not survive on standard media that lacked branched chain amino acids. We also  
208 predicted that *Mpals* loss of function mutants would be rescued by growing them in media with

209 branched chain amino acids, in the same way that chlorsulfuron-lethality was suppressed by growing  
210 chlorsulfuron-treated wild-type plants in the presence of branched chain amino acids.

211 We generated *Mpals* mutants by CRISPR/Cas9 mutagenesis using two separate guide RNAs.  
212 The first guide RNA (F) was complementary to a sequence in the second exon, 5' of the conserved  
213 thiamine pyrophosphate (TPP) binding domain. The second guide RNA (W) was complementary to a  
214 sequence near the beginning of the last exon. We predicted that mutations at these sites could lead  
215 to a total loss of function of the encoded protein. Plants were transformed with either the F or the  
216 W guide RNAs and plated on selective medium supplemented with branched chain amino acids. The  
217 medium was supplemented with branched chain amino acids because it was expected that at least  
218 some of the *Mpals* mutants would be auxotrophic for branched chain amino acids. 100 lines were  
219 selected from the transformation and the *MpALS* gene was sequenced in 31 plants. 16 of the  
220 sequenced transformants had mutations in *MpALS*. Four mutant lines – *Mpals<sup>lofF12</sup>*, *Mpals<sup>lofF16</sup>*,  
221 *Mpals<sup>lofF32</sup>*, *Mpals<sup>lofF84</sup>* – with mutations in the regions of the gene complementary to the F guide RNA  
222 were identified. We predict that *Mpals<sup>lofF16</sup>*, *Mpals<sup>lofF32</sup>*, *Mpals<sup>lofF84</sup>* are loss of function mutations  
223 because each has deletions that result in frame shifts in the coding sequence. We predict that  
224 *Mpals<sup>lofF12</sup>* is either wild-type or a weak loss of function mutant because it harbours an in-frame  
225 insertion. Two mutant lines – *Mpals<sup>lofW20</sup>* and *Mpals<sup>lofW29</sup>* – were identified in the regions of the gene  
226 complementary to the W guide RNA. The mutations in the *MpALS* sequence in each of the six  
227 mutants are presented in Fig 3.

228

229 **Fig 3. Six independent *MpALS* mutant lines were generated using CRISPR/Cas9 mediated targeted**  
230 **mutagenesis.**

231 **(A, B)** Mutations in *MpALS* were generated using a gRNA targeting the 2<sup>nd</sup> exon (gRNA<sub>F</sub>) or the 8<sup>th</sup>  
232 exon (gRNA<sub>W</sub>). The thiamine pyrophosphate binding domain is represented by grey boxes, all other

233 exons are represented by black boxes. Mutations are indicated by yellow letters, insertions by red  
234 letters, and deletions by red dashes.

235 **(C)** A description of the mutations generated by CRISPR/Cas9 and predicted amino acid changes in  
236 the 6 *Mpals<sup>lof</sup>* mutants.

237 **(D)** 18-day-old gemmalings grown on Johnsons' medium with or without supplemented branched  
238 chain amino acids (800  $\mu$ M). Scale bar = 5 mm.

239

240 Different *Mpals* mutants were grown on branched chain amino acids and gemmae from  
241 each line were harvested. These gemmae were then grown either in standard media (without  
242 branched chain amino acids) or in media supplemented with branched chain amino acids. The line  
243 containing the in-frame insertion – *Mpals<sup>lof\_F12</sup>* – grew in both the standard media and the branched  
244 chain amino acid-supplemented media (Fig 3D). This is consistent with the hypothesis that this  
245 mutant is prototrophic for branched chain amino acids as expected for a line with a wild-type *MpALS*  
246 or weak loss of function *MpALS* gene. By contrast, all five of the putative strong loss of function  
247 mutants grew on media containing branched chain amino acids, while none grew on standard media  
248 without the branched chain amino acid supplements. This suggests that these mutants are branched  
249 chain amino acid auxotrophs. These data demonstrate that loss of ALS function is lethal in *M.*  
250 *polymorpha* and the lethal phenotype can be suppressed by branched chain amino acid  
251 supplements. The observation that branched chain amino acid media supplementation suppresses  
252 the lethality of *Mpals* loss of function mutations and chlorsulfuron treatment, is consistent with  
253 the hypothesis that chlorsulfuron inhibits ALS activity in *M. polymorpha*.

254

255 **Chlorsulfuron-treatment induces transcriptome changes and the**  
256 **accumulation of some non-branched chain amino acids**

257 To determine if the presence of chlorsulfuron induced transcriptome changes we generated  
258 transcriptomes from plants that were grown on standard media for 8 days and were then  
259 transferred to chlorsulfuron-containing media for between 2 and 48 hours. Control plants were  
260 plants grown on standard media for 8 days and then transferred to standard media (with no  
261 chlorsulfuron) for 2-48 hours. Transcriptomes for each time point and treatment were generated  
262 from two technical replicates and each replicate consisted of six plants. There was a large difference  
263 in the transcriptomes of chlorsulfuron-treated and untreated controls. Steady state levels of 3093  
264 mRNAs were changed by chlorsulfuron treatment. 1612 mRNAs were more abundant in at least one  
265 timepoint in chlorsulfuron-treated plants than in controls. Steady state levels of 1708 mRNAs were  
266 less abundant in at least one time point in the treated plants than in controls (Fig 4A). The  
267 differences in the transcriptomes of chlorsulfuron-treated and control plants are consistent with the  
268 hypothesis that chlorsulfuron-treatment induces transcriptome changes in *M. polymorpha*.

269

270 **Fig 4. Chlorsulfuron treatment induces transcriptome changes and high levels of some non-**  
271 **branched chain amino acids**

272 **(A)** Numbers of genes with altered mRNA steady state levels 0-48 h after chlorsulfuron treatment  
273 compared to control treatments.

274 **(B)** Enriched Gene Ontology (GO) terms of mRNAs that were more abundant in chlorsulfuron-treated  
275 plants compared to untreated plants. Cut-off lines drawn at equivalentents of  $p=0.05$ ,  $p=0.01$ ,  $p=0.001$ .

276 **(C-E)** Non-targeted metabolomic analysis of wild-type plants treated for 24 h with 100 nM  
277 chlorsulfuron and untreated plants. Samples were analysed by LC-MS/MS using hydrophilic  
278 interaction liquid chromatography (HILIC) and reversed phase chromatography (RP). Principal

279 component analyses of control (C1-6) and herbicide-treated (H1-6) samples using HILIC **(C)** and RP  
280 **(D)**. Volcano plots of differentially abundant metabolites in chlorsulfuron-treated plants compared  
281 to untreated plants using HILIC **(E)** and RP **(F)**. Blue box indicates significantly lower levels of  
282 metabolites and red box indicates significantly higher levels of metabolites. Significance based on  
283 one-way ANOVA followed by Tukey HSD post-hoc test.

284

285 To identify physiological processes that were impacted by the chlorsulfuron-induced  
286 transcriptome changes we carried out an analysis of Gene Ontology (GO) terms that were enriched  
287 among the 1612 mRNAs with higher steady state levels in chlorsulfuron-treated plants compared to  
288 controls. This showed that GO terms associated with branched chain amino acid biosynthesis and  
289 branched chain amino acid metabolism are significantly enriched at 6 hours ( $p < 1.10^{-6}$  and  $p < 1.10^{-7}$ ),  
290 36 hours ( $p < 0.001$  and  $p < 1.10^{-5}$ ) and 48 hours ( $p < 1.10^{-4}$  and  $p < 1.10^{-5}$ ) after chlorsulfuron-  
291 treatment compared to other GO terms (Fig 4B). This is consistent with the hypothesis that  
292 chlorsulfuron treatment blocks branched chain amino acid synthesis in *M. polymorpha* because  
293 inhibition of the pathway results in an increase in the mRNA levels of genes that code for proteins  
294 involved in branched chain amino acid synthesis.

295 The GO term enrichment analysis also demonstrates that GO terms for amino acid  
296 biosynthesis and metabolism are enriched after 6 hours chlorsulfuron treatment in mRNAs that are  
297 more abundant in chlorsulfuron-treated plants than controls (Fig 4B). These transcriptome profiles  
298 predict that levels of some non-branched chain amino acids would be higher in chlorsulfuron-treated  
299 plants than in untreated controls. To test this hypothesis, we measured the levels of amino acids  
300 (and other metabolites) in chlorsulfuron-treated and untreated controls. Plants were grown for 11  
301 days and treated with 100 nM chlorsulfuron for 24 hours before being extracted. Control plants  
302 were transferred to standard media for 24 hours before extraction. Using two independent  
303 separation methods – hydrophilic interaction liquid chromatography and reversed phase

304 chromatography – we found that levels of threonine, tryptophan, arginine, serine, alanine, tyrosine,  
305 glutamine, citrulline and phenylalanine are higher in chlorsulfuron-treated plants than in the  
306 untreated controls (Fig 4 C-F). This is consistent with the transcriptome profiles observed in  
307 chlorsulfuron-treated plants. This suggests that inhibition of ALS causes changes not only in the  
308 branched chain amino acid pathway but in other amino acid pathways and therefore may have wide  
309 ranging physiological impacts on the plant.

310 We conclude that inhibition of branched chain amino acid synthesis by chlorsulfuron results  
311 in an increase in the steady state levels of mRNAs for enzymes involved in amino acid synthesis,  
312 possibly due to a branched chain amino acid deficiency-induced transcriptional response. These  
313 transcriptome changes may have led to increased levels of amino acids such as threonine,  
314 tryptophan, arginine, serine, alanine, tyrosine, glutamine, and phenylalanine.

315

## 316 Induction of gene expression by chlorsulfuron requires the inhibition 317 of the herbicide-sensitive target acetolactate synthase

318 It has been hypothesized that a sensing mechanism initiates the detoxification of herbicides in plants  
319 (26). According to this hypothesis, a sensing mechanism detects the herbicide, and the sensor  
320 programs transcriptome changes that increase the expression of genes encoding proteins that  
321 chemically modify herbicides (detoxification). An alternative hypothesis is that there is no specific  
322 herbicide sensing mechanism and therefore no inducible system of herbicide resistance. If the  
323 difference between herbicide-treated and untreated transcriptomes depends on a sensing  
324 mechanism, the differences should also be observed in chlorsulfuron-treated plants even if  
325 chlorsulfuron cannot inhibit its target, as in *Mpals<sup>cs</sup>* target site resistant mutants. If, on the other  
326 hand, the transcriptome changes are the result of metabolic changes caused by inhibition of ALS

327 activity, then the transcriptome changes should not be observed in *Mpals<sup>cs</sup>* target site resistant  
328 mutants.

329 To determine if the chlorsulfuron-induced transcriptome changes observed in wild-type  
330 were also observed in chlorsulfuron target site resistant mutants, we generated transcriptomes from  
331 chlorsulfuron-treated and untreated *Mpals<sup>csP197L\_7</sup>* and *Mpals<sup>csP197L\_10</sup>* target site resistant mutants  
332 (Fig 5). While chlorsulfuron-treatment of wild-type plants resulted in large changes in the steady  
333 state levels of over 3093 mRNAs, the steady state levels of most mRNAs were the same in  
334 chlorsulfuron-treated and untreated *Mpals<sup>cs</sup>* mutants (Fig 5B). 21 mRNAs were more abundant and  
335 16 less abundant in chlorsulfuron-treated *Mpals<sup>csP197L\_7</sup>* plants compared to untreated controls.  
336 Similarly, 2 mRNAs were more abundant and 1 less abundant in chlorsulfuron-treated *Mpals<sup>csP197L\_10</sup>*  
337 plants compared to untreated controls (Fig 5B). Importantly, no single mRNA changed abundance in  
338 every background – wild-type, *Mpals<sup>csP197L\_7</sup>* and *Mpals<sup>csP197L\_10</sup>* – when treated with chlorsulfuron  
339 compared to untreated controls (Fig 5C). These data indicate that the chlorsulfuron-induced  
340 transcriptome change observed in wild-type is not observed in *Mpals<sup>csP197L\_7</sup>* or *Mpals<sup>csP197L\_10</sup>*  
341 mutants.

342

343 **Fig 5. Chlorsulfuron treatment does not alter gene mRNA steady state levels in *Mpals<sup>chrP197L</sup>***  
344 **mutants**

345 **(A)** Wild-type, *Mpals<sup>chrP197\_7</sup>* and *Mpals<sup>chrP197\_10</sup>* lines grown for 7 days on untreated media then  
346 transferred to media containing 0 or 5 nM CS for 7 days. Scale bar = 5 mm.

347 **(B)** Differentially expressed genes (DEGs) between CS-treated and untreated plants in each  
348 genotype. Blue bar represents genes with higher mRNA steady state levels, green bar represents  
349 genes with lower mRNA steady state levels, and yellow bar represents genes with either higher or  
350 lower mRNA steady state levels in CS-treated plants compared to untreated plants.

351 **(C)** Number of differentially expressed genes in CS treated plants compared to untreated plants  
352 between Tak-2, *Mpals<sup>chlP197\_7</sup>* and *Mpals<sup>chlP197\_10</sup>*.

353

354           These data are not consistent with chlorsulfuron itself being sensed by the plant and this  
355 sensing mechanism initiating a transcriptome response. Instead, the data are consistent with the  
356 transcriptome changes induced by chlorsulfuron treatment being the result of the inactivation of the  
357 herbicide target, ALS. The change in gene expression caused by chlorsulfuron-treatment is likely a  
358 result of the metabolic changes caused, directly and indirectly, by the inhibition of ALS by the  
359 herbicide.

360

361 **Ectopic overexpression of genes encoding cytochrome P450**  
362 **monooxygenases and glutathione S-transferases does not confer**  
363 **resistance to chlorsulfuron**

364 If the chlorsulfuron-induced transcriptome changes result from the inhibition of ALS and its  
365 physiological consequences – and not from a chlorsulfuron-sensing mechanism that induces  
366 transcriptome changes that lead to the production of enzymes that detoxify chlorsulfuron – we  
367 predicted that genes encoding enzymes induced by exposure to chlorsulfuron would not form part  
368 of such a sensing mechanism and would therefore not detoxify the herbicide.

369           To test this hypothesis, we ectopically overexpressed four genes whose steady state levels of  
370 mRNA abundance increased upon chlorsulfuron treatment (Table 1). To maximize the chances of  
371 identifying a gene with detoxifying potential, we selected members of the cytochrome P450  
372 monooxygenases and glutathione transferases, because overexpression of members of these  
373 families in mutant weeds confers herbicide resistance (49). To further increase the chances of



374 identifying members of the GST and CYP families that might detoxify chlorsulfuron, we selected  
 375 genes from GST and CYP clades that had previously been shown to increase herbicide tolerance  
 376 when overexpressed in herbicide resistant weeds (49–52). Using these criteria, we selected  
 377 MpCYP813A5 and MpCYP822A1 from the cytochrome P450 clan 72 and clan 71 respectively, and  
 378 MpGSTF15 and MpGSTF10 from the glutathione transferase  $\phi$  clade.

379  
 380  
 381

382  
 383

384 **Table 1. Several cytochrome P450 monooxygenases and glutathione S-transferases had higher**  
 385 **mRNA steady state levels in CS-treated compared to untreated plants in both RNA-Seq and qRT-**  
 386 **PCR experiments.**

| Gene ID<br>(Marpolbase) | Functional name   | RNA-Seq up-regulation<br>(Fold change Treated/Untreated) <sup>a</sup> |        |        |          |         | qRT-PCR verification<br>(relative fold change<br>Treated/Untreated) <sup>b</sup> |        |        |        |
|-------------------------|-------------------|-----------------------------------------------------------------------|--------|--------|----------|---------|----------------------------------------------------------------------------------|--------|--------|--------|
|                         |                   | 6 HAT                                                                 | 12 HAT | 24 HAT | 36 HAT   | 48 HAT  | 6 HAT                                                                            | 12 HAT | 24 HAT | 36 HAT |
| <b>Mapoly0022s0192</b>  | <b>MpCYP813A5</b> | 10.37***                                                              |        |        | 10.41*** | 7.41*** | 1.09                                                                             | 1.13   | 1.62*  | 1.09   |
| Mapoly0041s0103         | MpCYP822B2        | 2.70***                                                               |        |        |          |         | 0.94                                                                             | 1.03   | 1.24   | 1.16   |
| Mapoly0057s0084         | MpCYP821B1        | 2.40**                                                                |        |        |          |         | n.a.                                                                             |        |        |        |
| Mapoly0103s0038         | MpCYP710A16       | 2.89***                                                               |        |        | 2.10**   |         | 0.96                                                                             | 1.01   | 1.26   | 1.08   |
| Mapoly0163s0018         | MpCYP73A109       | 2.18**                                                                |        |        | 2.46***  | 2.24**  | 1.16                                                                             | 0.97   | 1.10   | 1.72** |
| Mapoly0094s0036         | MpCYP823A2        | 2.95***                                                               | 2.07*  |        | 3.50***  | 3.09*** | 0.93                                                                             | 0.93   | 1.08   | 1.69** |
| Mapoly0066s0002         | MpCYP704AH1       |                                                                       |        | 5.29*  |          |         | 0.70                                                                             | 1.11   | 0.87   | 1.07   |
| <b>Mapoly0010s0184</b>  | <b>MpCYP822A1</b> |                                                                       |        |        | 14.20*** | 7.83*** | 1.05                                                                             | 1.18   | 2.43*  | 2.83** |
| Mapoly0067s0051         | MpCYP829E1        |                                                                       |        |        | 3.65***  | 3.50*** | 0.82                                                                             | 1.02   | 1.06   | 1.42*  |
| Mapoly0095s0013         | MpCYP822B1        |                                                                       |        |        | 3.65***  | 3.91*** | n.a.                                                                             |        |        |        |
| Mapoly0141s0021         | MpCYP94L1         |                                                                       |        |        | 3.51***  | 3.00*** | 0.99                                                                             | 1.64   | 1.64   | 2.84*  |
| Mapoly0021s0144         | MpCYP704N1        |                                                                       |        |        | 2.68***  | 2.84*** | 0.86                                                                             | 1.70   | 1.47   | 1.82   |
| Mapoly0081s0008         | MpCYP73A110       |                                                                       |        |        | 2.61***  | 2.75*** | 0.84                                                                             | 1.51   | 1.34   | 2.11*  |
| Mapoly0004s0177         | MpCYP829B1        |                                                                       |        |        | 2.44***  | 2.33*** | n.a.                                                                             |        |        |        |
| Mapoly0004s0182         | MpCYP829F1        |                                                                       |        |        | 2.13*    | 3.22*** | n.a.                                                                             |        |        |        |

|                        |                 |                |        |       |                 |                 |      |      |               |               |
|------------------------|-----------------|----------------|--------|-------|-----------------|-----------------|------|------|---------------|---------------|
| Mapoly0002s0331        | MpCYP817A1      |                |        | 2.02* | 2.26**          | n.a.            |      |      |               |               |
| Mapoly0024s0025        | MpCYP813B1      |                |        |       | 6.27*           | n.a.            |      |      |               |               |
| Mapoly0144s0022        | MpCYP704L1      |                |        |       | 4.90*           | n.a.            |      |      |               |               |
| Mapoly0014s0215        | MpCYP880A1      |                |        |       | 2.14***         | n.a.            |      |      |               |               |
| Mapoly0090s0052        | MpCYP716X1      |                |        |       | 2.02*           | n.a.            |      |      |               |               |
| <b>Mapoly0046s0045</b> | <b>MpGSTF15</b> | <b>11.74**</b> |        |       | <b>27.95***</b> | <b>30.15***</b> | 1.08 | 1.39 | <b>6.16*</b>  | <b>7.56**</b> |
| Mapoly0031s0032        | MpGSTU1         | 4.02*          |        |       | 16.28***        | 10.38***        | n.a. |      |               |               |
| Mapoly0818s0001        | MpGSTF8         | 6.39**         |        |       | 11.02***        | 6.41***         | 0.95 | 1.57 | 4.82          | 3.87*         |
| Mapoly0177s0013        | MpGSTF5         | 5.33***        | 3.68*  |       | 8.46***         | 7.23***         | n.a. |      |               |               |
| <b>Mapoly0193s0023</b> | <b>MpGSTF10</b> | 3.73**         |        |       | <b>11.46***</b> | <b>14.09***</b> | 0.88 | 1.56 | <b>3.00**</b> | <b>5.91*</b>  |
| <b>Mapoly1812s0001</b> | <b>MpGSTF7</b>  | 3.22**         |        |       | 3.77***         | 2.81**          | 0.87 | 1.33 | 1.58          | 2.63**        |
| Mapoly0016s0155        | MpGSTH1         |                | 2.01** |       |                 |                 | 0.95 | 1.26 | 0.74          | 1.12          |
| Mapoly0009s0025        | MpGSTF18        |                |        |       | 5.94***         | 7.46***         | n.a. |      |               |               |
| Mapoly0185s0005        | MpGSTF13        |                |        |       | 3.63***         | 3.30***         | n.a. |      |               |               |
| Mapoly0008s0167        | MpURE2p1        |                |        |       | 3.46***         | 3.68***         | n.a. |      |               |               |
| Mapoly0020s0134        | MpGSTT2         |                |        |       | 2.86***         | 3.22***         | n.a. |      |               |               |
| Mapoly0002s0202        | MpGSTF1         |                |        |       | 2.66*           |                 | n.a. |      |               |               |
| Mapoly0001s0057        | MpGSTK2         |                |        |       | 2.37***         |                 | n.a. |      |               |               |
| Mapoly0141s0017        | MpGSTF11        |                |        |       |                 | 2.43***         | n.a. |      |               |               |

387 Colouring is based on level of fold change (FC) with  $0 \leq FC < 1.5$  or non-significant FC: white,  $2.5 \leq FC$

388  $< 4$ : salmon,  $4 \leq FC < 10$ : orange,  $10 \leq FC$ : brick. Genes in bold were selected for functional analysis

389 by overexpression.

390 <sup>a</sup> Fold change is calculated using the DESeq2 package (53). Significance is calculated with an adjusted

391 *p*-value using the Benjamini-Hochberg method to control the false discovery rate.

392 <sup>b</sup> Relative fold change in RT-qPCR was calculated from internal control genes. Significant differences

393 are calculated from students t-tests between treated and untreated groups for each gene and

394 timepoint (*n* = 3). (\* = *p* < 0.05, \*\* = *p* < 0.01, \*\*\* = *p* < 0.001, n.s. = not significant).

395

396 Wild-type spores were transformed with overexpression vectors containing each gene under

397 the transcriptional control of the MpELONGATIONFACTOR1 $\alpha$  promoter (*proEF1 $\alpha$* ) using the *NOS*

398 terminator. Controls were generated by transforming wild-type spores with the empty vector

399 (construct without the CYP or GST coding sequence). Transformed plants were grown, RNA isolated

400 and the steady state levels of the respective CYP and GST mRNA measured using quantitative

401 reverse transcription polymerase chain reaction (RT-qPCR). Steady state levels of MpCYP813A5 and  
402 MpCYP822A1 mRNA were 4000 times higher and 60 times higher in *proEF1α:MpCYP813A5\_7* and  
403 *proEF1α:MpCYP822A1\_3* transformed plants than in empty vector controls respectively (Fig 6 A).  
404 Steady state levels of MpGSTF15 and MpGSTF10 from mRNA were 2.5 times higher and 300 times  
405 higher in *proEF1α:MpGSTF15\_5* and *proEF1α:MpGSTF10\_17* transformed plants than in empty  
406 vector controls respectively (Fig 6 A).

407

408 **Fig 6. Ectopic overexpression of genes encoding cytochrome P450 monooxygenases and**  
409 **glutathione S-transferases does not confer resistance to chlorsulfuron**

410 **(A)** Relative mRNA abundance in 12-day-old gemmalings of MpCYP813A5, MpCYP822A1, MpGSTF10  
411 and MpGSTF15 over-expressing lines and wild-type (Tak-1 and Tak-2) was compared to relative  
412 mRNA abundance in empty vector controls (dotted line, n = 3). mRNA abundance is given as x-fold  
413 change. Statistical significance based on student t-test is given for each line compared to empty  
414 vector control. \* =  $p < 0.05$ , \*\* =  $p < 0.01$ , \*\*\* =  $p < 0.001$ , n.s. = not significant. Error bars are  $\pm$  SD.

415 **(B)** 14-day-old gemmalings of an empty vector line (B, a-c) and of MpCYP813A5, MpCYP822A1,  
416 MpGSTF10 and MpGSTF15 over-expressing lines (B, d-l) grown on untreated solid medium (Control),  
417 30 nM CS and 200 nM CS. Images taken on a Berthold NightOwl. Chlorophyll autofluorescence is  
418 used to measure gemmaling area (mm<sup>2</sup>) which is treated as a proxy for growth. Images of whole  
419 120x120 mm square petri dish.

420 **(C)** Box and whisker plot where whiskers are first and fourth quartiles, boxes represent second and  
421 third quartiles, and the horizontal line is the median. N = 18. Statistical significance is measured by a  
422 Kruskal-Wallis test. Significant groups determined by a Nemenyi post-hoc test. \* =  $p < 0.05$ , \*\* =  $p <$   
423  $0.01$ , \*\*\* =  $p < 0.001$ , n.s. = not significant. Error bars are  $\pm$  SD. The same data for the 30 nM CS  
424 treatment is shown on a smaller y axis in **(D)**.

425

426 Gemmae from control and transformed plants were grown on 0 mM (control), 30 nM and  
427 200 nM chlorsulfuron. The growth of all transformed genotypes was reduced slightly compared to  
428 the empty vector control when grown on media without chlorsulfuron (Fig 6 B, C). Therefore, to  
429 control for within-genotype growth differences, plant area was presented as percentage of area of  
430 untreated plants for each genotype (Fig 6 D). No genotypes grew on media containing 200 mM  
431 chlorsulfuron, indicating that the plants transformed with the CYP and GST overexpressing  
432 constructs were sensitive to the herbicide (Fig 6 B, C). There was almost no growth of any genotype  
433 on 30 mM, but *proEF1α:MpCYP822A1\_3* transformed plants grew slightly more than the control ( $p <$   
434  $0.001$ ) (Fig 6B, C, D). The *proEF1α:MpCYP822A1\_3* transformed plants grew to 3.4% (SD = 1.2) of the  
435 area of untreated plants, while the empty vector grew to 1.1% (SD = 0.8) area of untreated plants.  
436 However, this percentage growth is very small compared to each genotype grown in the absence of  
437 chlorsulfuron, therefore *MpCYP822A1* overexpression does not restore growth of chlorsulfuron-  
438 treated plants to untreated levels

439 We conclude that ectopic overexpression of two CYP-encoding genes and two GST-encoding  
440 genes did not confer chlorsulfuron tolerance. These data are consistent with the hypothesis that  
441 genes whose steady state mRNA levels increase on chlorsulfuron-treatment are not involved in  
442 herbicide detoxification.

443

## 444 Discussion

445 We show that the herbicide chlorsulfuron induces a transcriptome response in sensitive *M.*  
446 *polymorpha* plants. However, this transcriptome response does not occur in target-site-resistant  
447 mutants (*Mpals<sup>CS</sup>*) treated with chlorsulfuron. The observation that the transcriptome change does  
448 not occur in mutants where the chlorsulfuron cannot inhibit the activity of its target, the ALS

449 enzyme, suggests that inhibition of ALS is required for the transcriptome response. It also suggests  
450 that the presence of chlorsulfuron alone is not sufficient to induce the transcriptome response. If the  
451 presence of chlorsulfuron is insufficient to induce a transcriptome response, it suggests that the  
452 herbicide molecule is not sensed by the plant. We conclude that a mechanism that senses  
453 chlorsulfuron does not exist in *M. polymorpha*, and the observed transcriptome response is the  
454 result of direct and or indirect effects of the inhibition of ALS by chlorsulfuron. If this observation is  
455 holds true for other plant species and with other herbicides, it suggests that a herbicide-sensing  
456 system that induces herbicide detoxification mechanisms does not exist in plants. We hypothesize  
457 that a herbicide-sensing system that induces transcriptional changes that promote the production of  
458 proteins active in herbicide detoxification does not exist in *M. polymorpha*, nor perhaps in other  
459 plants.

460         There is abundant evidence in the literature that treatment of plants with herbicides results  
461 in changes in steady state mRNA levels that are consistent with our data. However, the underlying  
462 cause of these herbicide-induced transcriptome changes has remained unclear. The transcriptome  
463 changes could have been due to the existence of a sensing mechanism that perceives the presence  
464 of a herbicide, which then activates a signalling pathway resulting in changes in gene expression as  
465 observed in the transcriptomes. Alternatively, the transcriptome changes could also have been the  
466 result of the inhibition of the target protein by the herbicide. In the research reported here, we have  
467 been able to distinguish between these possibilities. The data demonstrate that the chlorsulfuron-  
468 induced changes only occur if the herbicide target, the ALS enzyme, is sensitive to the herbicide. If  
469 the herbicide target is insensitive to the enzyme, the transcriptome change does not occur. Our data  
470 are therefore consistent with transcriptome data reported in the literature, but go a step further to  
471 show that the transcriptome change depends on the defective function of the herbicide target.

472         While we report that a chlorsulfuron sensing system does not exist in *M. polymorpha* and we  
473 hypothesize that herbicide sensing mechanisms do not exist in plants, since it has been shown that

474 transcriptome responses to ALS inhibitors are highly conserved across plant species (54), it is  
475 formally possible that such a sensing mechanism may exist in some plants for some herbicides. If so,  
476 we expect the presence of herbicides would activate a signalling pathway that would cause  
477 transcriptome changes and the production or activation of proteins that chemically modify the  
478 herbicide and reduce its toxicity. Such a herbicide-plant interaction remains to be demonstrated.

479 Our conclusion – that a herbicide sensing mechanism that induces herbicide detoxification  
480 does not exist – is consistent with observations from the field. Resistance to herbicides has evolved  
481 many times in the field. Non target site resistance (NTSR) is a form of herbicide tolerance which  
482 prevents the active herbicide from coming into contact with its target, either through the chemical  
483 modification of the compound or the sequestration of the compound so that it no longer has access  
484 to the herbicide target, and therefore cannot inhibit its biological function. NTSR is often the result  
485 of gene overexpression. These genes may encode proteins that oxidise the herbicide (e.g.  
486 cytochrome P450 monooxygenases), conjugate the herbicide to glutathione (e.g. glutathione  
487 transferases) or to saccharides (e.g. glycosyl-transferases) or transport the herbicide across a  
488 membrane (e.g. ABC transporters). Their overexpression is the result of a mutation that increases  
489 their expression levels compared to “wild-type”, herbicide sensitive weeds. These overexpressing,  
490 mutant alleles, would arise rarely in the field. However, these rare mutations would be selected for  
491 in the presence of intense herbicide selection. They could become dominant alleles in populations  
492 undergoing prolonged herbicide selection. While these resistance-conferring alleles contribute to  
493 resistance in the field, our data suggest that they are not part of an inducible mechanism that  
494 detoxifies herbicides.

495

## 496 General Conclusion

497 These data indicate that while chlorsulfuron-treatment results in transcriptome changes, these  
498 changes are not the result of a herbicide-sensing mechanism. Instead, the transcriptome changes

499 depend on the inactivation of the chlorsulfuron target. This is consistent with the hypothesis that  
500 transcriptome changes result from the disrupted physiology caused by the inhibition of ALS activity  
501 and are not specifically related to herbicide detoxification.

502

503

504

505

506

507

508

## 509 Materials and methods

### 510 Plant materials and growth conditions

511 *M. polymorpha* accessions Takaragaike-1 (Tak-1, male) and Takaragaike-2 (Tak-2, female) were used  
512 as wild-type plants (55). *Mpals<sup>cSP197L</sup>*, *Mpals<sup>lof</sup>*, *MpCYP813A5<sup>GOF</sup>*, *MpCYP822A1<sup>GOF</sup>*, *MpGSTF10<sup>GOF</sup>* and  
513 *MpGSTF15<sup>GOF</sup>* lines were generated as described below. Plants were propagated asexually from  
514 gemmae and grown in light cabinets under 30  $\mu\text{molm}^{-2}\text{s}^{-1}$  continuous white light at 23 °C.

515 Plants used in the metabolomic analyses, transcriptome analysis, quantitative real time PCR  
516 verification of transcriptome data and chlorsulfuron dose response assay were grown on 100x21 mm  
517 round petri dishes on top of autoclaved cellulose discs (A.A. Packaging Ltd, Preston, UK) placed on  
518 the surface of 30 ml Johnson's medium (56) with 0.8% agar. Plants were transferred from the  
519 herbicide-free medium to herbicide-containing medium by lifting the discs on which plants were  
520 growing from one plate to another. Plants used in the other experiments were grown on 120x120

521 mm square petri dishes with 60 mL half strength Gamborg medium (57) with 1% sucrose and 0.8%  
522 agar.

523 To generate spores for transformations, Tak-1 and Tak-2 plants were grown on a 1:3 mixture  
524 of vermiculite and John Innes No.2 compost and incubated in a growth chamber under a 16 h light:8  
525 h dark photoperiod at 23°C. Gametophore production was induced under far red light irradiation  
526 (58).

527

## 528 Generation of *Mpals<sup>csP197L</sup>* lines

529 *Mpals<sup>csP197L</sup>* mutant *M. polymorpha* plants were generated via UV-B mutagenesis. 10<sup>6</sup> spores were  
530 mutated under a UV-B wavelength of 302 nm and grown on 140 nM (0.05 ppm) chlorsulfuron under  
531 continuous light. Resistant plants were selected after 14 days.

532

## 533 Sequencing *MpALS* in wild-type and *Mpals<sup>csP197L</sup>* plants

534 To determine the mutations in the *ALS* gene of *Mpals<sup>csP197L</sup>* lines, whole plant DNA was extracted  
535 from two mutants (*Mpals<sup>csP197L\_7</sup>* and *Mpals<sup>csP197L\_10</sup>*) and wild-type (Tak-2) using the CTAB method  
536 adapted from (59). DNA concentration was measured on a Nanodrop ND-1000 spectrophotometer.

537 A 140 bp region of the *M. polymorpha ALS* gene that contains the most commonly found  
538 mutations conferring resistance to ALS-inhibitors was amplified by polymerase chain reaction (PCR)  
539 using the PCR BIO HiFi polymerase and buffer (PCR Biosystems, Cat. No. PB10.41-02). The  
540 amplification was carried out using a BIO-RAD Dyad Peltier thermal cycler. Each reaction was  
541 conducted in a 50 µl mixture, consisting of 10 µl reaction buffer, 2 µl of forward primer, 2 µl of  
542 reverse primer, 5 µl of DNA, 0.5 µl of HiFi Polymerase, and 30.5 µl of DNase free milli-Q H<sub>2</sub>O, with  
543 three replicates per sample. The PCR program consisted of 1 min initial denaturation phase at 95 °C,



544 followed by 32 cycles, with each cycle consisting of a 15 s incubation time at 95 °C, a 15 s incubation  
545 at 56 °C annealing temperature, and a 30s extension time at 72 °C. Amplified DNA was extracted  
546 from the gel using the QIAquick Gel Extraction Kit (Qiagen, Hilden, Germany). The quantity of  
547 extracted DNA was measured on a Nanodrop ND-1000 spectrophotometer. Samples were  
548 sequenced by Sanger sequencing (Source Bioscience, Oxford, UK). The primers used for PCR  
549 amplification and sequencing are listed below.

550

## 551 Chlorsulfuron effect on *M. polymorpha* growth

552 A whole plant dose-response experiment was carried out to determine the sensitivity of wild-type  
553 and target-site resistant plants to chlorsulfuron. Chlorsulfuron, 1-(2-chlorophenylsulfonyl)-3-(4-  
554 methoxy-6-methyl-1,3,5-triazin-2-yl)urea, was supplied by Sigma Aldrich and diluted in milli-Q H<sub>2</sub>O,  
555 then filter sterilized with a 0.2 µM sterile syringe filter. Chlorsulfuron was pipetted into melted  
556 medium and mixed thoroughly before pouring into plates. The female *M. polymorpha* accession  
557 (Tak-2) was chosen as the susceptible biotype to chlorsulfuron because it tends to grow flatter on  
558 the medium than Tak-1 making it easier to image. Tak-2, *Mpals<sup>csP197L\_7</sup>* and *Mpals<sup>csP197L\_10</sup>* gemmae  
559 were grown for 7 days then transferred onto herbicide treated plates and replaced in the growth  
560 cabinet for 7 days before imaging. Tak-2 plants were treated with ten herbicide doses: 0 nM, 0.1 nM,  
561 0.2 nM, 0.5 nM, 1 nM, 1.5 nM, 2.5 nM, 5 nM, 10 nM, and 30 nM chlorsulfuron. *Mpals<sup>csP197L</sup>* plants  
562 were treated with ten herbicide doses: 1 nM, 2 nM, 5 nM, 10 nM, 20 nM, 50 nM, 100 nM and 300  
563 nM chlorsulfuron. There were two replicate plates per herbicide dose and five plants grown per  
564 plate. The plants were imaged using a Panasonic Lumix camera (model no. DMC-FS7) on day 7 after  
565 transfer to herbicide plates. Lateral growth was quantified using Image J. Data were expressed as %  
566 of the average area of untreated plants and were plotted with a non-linear fit, sigmoidal, four-  
567 parameter regression curve using GraphPad Prism 9.1.0 (GraphPad Software, Inc., San Diego, CA,  
568 USA). The herbicide dose resulting in 50% growth reduction (GR<sub>50</sub>) was calculated as follows:

569

$$y = C + \frac{D - C}{1 + \left(\frac{ED50}{x}\right)^b}$$

570 In which C is the lower limit, D is the upper limit, ED<sub>50</sub> is the effective dose which reduced growth by  
571 50%, and b is the slope at ED<sub>50</sub>. Resistance index was then calculated as follows:  $RI = \frac{GR50(S)}{GR50(R)}$

572

### 573 **Branched chain amino acid growth assay**

574 Tak-2 gemmae were grown in petri dishes on solid medium supplemented with 800 µM branched  
575 chain amino acids, 800 µM branched chain amino acids and 100 nM CS, with 100nM CS only or on  
576 unsupplemented medium and grown for 14 days. Whole plates were imaged using a Berthold  
577 NightOwl II LB 983 *In Vivo* imaging system (Berthold, Bad, Wildbad, Germany) which detects  
578 chlorophyll autofluorescence (560 nm). Images were taken after exposing the plants to 120 s white  
579 light. The area (mm<sup>2</sup>) of living tissue was measured using indiGo™ software (Berthold, Bad Wildbad,  
580 Germany). Statistical significance was based on Kruskal-Wallis test, with groups determined by  
581 Nemenyi post-hoc test.

582

### 583 **Sample extraction for metabolomic analysis**

584 11-day old Tak-2 plants were transferred to medium containing 100 nM CS or untreated medium for  
585 24 hours, then extracted. Approximately 150 mg of fresh plant tissue per sample was collected and  
586 frozen immediately in liquid N<sub>2</sub>. 6 biological replicates were collected per treatment group.  
587 Metabolite extraction was as follows. 500 µL methanol:acetonitrile:H<sub>2</sub>O (2:2:1, v/v) (stored at -20 °C)  
588 was added to each sample. Plant material was then homogenised for 2 min in a tissuelyser (Qiagen)  
589 using adaptors kept at -70 °C. Samples were incubated for 1 h at -20 °C followed by centrifugation at  
590 14,000 rpm at 4 °C. The supernatant was removed and placed in a new Eppendorf tube, and stored

591 at -20 °C. 400  $\mu$ L of 80% methanol:water (stored at -20 °C) was added to the precipitate then  
592 vortexed for 60 s at 4-8 °C. Samples were incubated for 1 h at -20 °C then centrifuged for 14,000 rpm  
593 at 4 °C. The supernatant from the first extraction was combined with the second extraction, and the  
594 samples were stored for 2 h at -20 °C. Samples were centrifuged one final time at 14,000 rpm for 10  
595 min at 4 °C. The supernatant was transferred to a new Eppendorf tube, frozen in liquid N<sub>2</sub> then  
596 stored at -80 °C.

597

## 598 Targeted metabolomic analysis

599 Liquid chromatography-tandem mass spectrometry (LC-MS/MS) analysis of samples from  
600 chlorsulfuron-treated and untreated plants was performed by the Metabolomics Facility at Vienna  
601 BioCenter Core Facilities (VBCF), member of the Vienna BioCenter (VBC), Austria and funded by the  
602 City of Vienna through the Vienna Business Agency. For the analysis of branched chain amino acids  
603 and their precursors, 1  $\mu$ L of the metabolite extract was injected on a Kinetex C8 column (100 Å, 100  
604 x 2.1 mm), employing a flow rate of 80  $\mu$ L/min. A 5-min-long gradient from 95% A (0.1 % formic acid  
605 in water) to 60% B (0.1 % formic acid in acetonitrile) was used for the separation. The HPLC (RSLC  
606 ultimate 3000; Thermo Fisher Scientific) was directly coupled to a TSQ Altis mass spectrometer  
607 (Thermo Fisher Scientific) via electrospray ionization. The following SRM (selected reaction  
608 monitoring) transitions were used in the positive ion mode: m/z 118.1 to m/z 72 (valine), m/z 132.1  
609 to m/z 86.1 (isoleucine and leucine), m/z 205.1 to m/z 188 (tryptophan). Isopropylmalate wash was  
610 measured in the negative ion mode using the transitions m/z 175.1 to m/z 115 and m/z 118.1 to m/z  
611 113. Optimal collision energies and retention times were determined and validated for each  
612 metabolite with the respective authentic standard. Other amino acid precursor metabolites (e.g. 2-  
613 ketobutyric acid) were targeted using the respective SRMs but only detected in the mixture of  
614 authentic standards. The data was manually interpreted using Trace Finder (Thermo Fisher  
615 Scientific).

616

## 617 **Non-targeted metabolomic analysis**

618 For the non-targeted detection of metabolites in chlorsulfuron treated and untreated plants,  
619 samples were analysed by LC-MS/MS using the hydrophilic interaction liquid chromatography (HILIC)  
620 the reversed phase chromatography (RP) separation methods. 1 µL of each sample was injected  
621 independently onto two different phase systems, on a SeQuant ZIC-pHILIC HPLC column (Merck, 100  
622 x 2.1 mm; 5 µm) and on a C18-column (Waters, ACQUITY UPLC HSS T3 150 x 2.1; 1.8 µm). 6 µL of  
623 each sample was pooled into a quality control (QC) sample used for normalization. Separation was  
624 performed with a flow rate of 100 µl/min employing an Ultimate 3000 HPLC system (Thermo Fisher  
625 Scientific, Germany). In HILIC (hydrophilic interaction liquid chromatography) a 25 min gradient from  
626 10% to 80% B was used (A: acetonitrile (ACN); B: 25 mM ammonium bicarbonate in water) and in  
627 reversed phase chromatography (RP) a gradient from 1% to 90% B in (A: 0.1% formic acid (FA) in  
628 water; B: 0.1% FA in ACN). The HPLC was coupled via electrospray ionization to the mass  
629 spectrometer. Metabolites were ionized via electrospray ionization in polarity switching mode,  
630 acquiring high-resolution tandem mass spectrometry data on a Q-Exactive Focus (Thermo Fisher  
631 Scientific, Germany) in data-dependent acquisition mode. Data sets were processed by Compound  
632 Discoverer (Thermo Fisher Scientific), searching our in-house library and publicly available spectral  
633 libraries with a mass accuracy of 3 ppm for precursor masses and 10 ppm for fragment ion masses.

634

## 635 **gRNA design and vector construction for the generation of *Mpals* loss** 636 **of function alleles**

637 The generation of mutations in the *MpALS* gene using the CRISPR/Cas9 system followed the method  
638 developed by (60). Two short guide RNAs (gRNAs) gRNA\_W (GTTCTGCCTATGATTCCTGG,  
639 complementary to nucleotides 1962 to 1984 of the coding sequence) and gRNA\_F

640 (CTCTGAGGGGACATGCATAC, complementary to the reverse strand of nucleotides 133 to 153 of the  
641 coding sequence) were designed to target two different locations in the MpALS DNA sequence.  
642 gRNAs must be upstream (5') of a PAM sequence (NGG) and contain a protospacer or 'target'  
643 sequence consisting of 20 nucleotides that are unique to MpALS. gRNAs were designed using the  
644 CRISPR-P website (61). Individual gRNAs were cloned in the MpU6-1pro:gRNA expression vector  
645 using BsaI overhangs. MpU6-1pro:gRNA was combined with the Cas9 expression vector, MpGE010  
646 via LR recombination. Vectors were transformed into *Escherichia coli* One Shot OmniMAX 2 T1  
647 (ThermoFisher Cat# C854003). CRISPR-Cas9 expression vectors carrying gRNA\_W or gRNA\_F were  
648 transformed in *Agrobacterium tumefaciens* (GV3101). *Agrobacterium*-mediated spore  
649 transformation followed previously described methods (55), with the additional step of  
650 supplementing 800  $\mu$ M isoleucine, leucine and valine to the *Agrobacterium* and spore liquid cultures  
651 and to the medium in the selection plates.

652

## 653 Selection and genotyping of transformants

654 Approximately 100 transformants were grown to adult size on medium containing the hygromycin  
655 selection and 800  $\mu$ M isoleucine, leucine and valine. One gemma was taken from each of 100  
656 transformants and placed on medium supplemented with 800  $\mu$ M branched chain amino acids,  
657 while a gemma from the same gemma cup was placed on medium without branched chain amino  
658 acids. Plants from which the gemma died or grew smaller on the medium lacking branched chain  
659 amino acids were then chosen as possible MpALS mutants and genotyped. Plants were genotyped  
660 using the Phire Plant Direct PCR kit (Thermo Fisher) using a 0.5 mm diameter piece of plant tissue  
661 and the manufacturer's recommended 3-step cycling protocol. Primers used for genotyping can be  
662 found listed below.

663

## 664 Sample preparation and RNA extraction

665 Total RNA was extracted from Tak-2 and target-site resistant mutants *Mpals<sup>csP197L\_7</sup>* and  
666 *Mpals<sup>csP197L\_10</sup>* across eight timepoints: 0h, 2h, 4h, 6h, 12h, 24h, 36h and 48h after transferring plants  
667 to herbicide-treated (5 nM) or untreated plates. The criteria for the selection of the herbicide dose  
668 was a dose causing a toxic effect without killing the plant, and was chosen based on the results from  
669 the dose response curve. There were two replicate samples per timepoint, and six plants per sample.  
670 Total RNA was extracted from 90 samples.

671 Gemmae were grown for 8 days on cellulose discs on untreated medium then moved onto  
672 chlorsulfuron-treated medium or untreated control plates. Plants were collected at the different  
673 timepoints after transfer onto chlorsulfuron and immediately frozen in liquid N<sub>2</sub> and kept at -80°C.  
674 Samples were pulverised with a tissuelyser (Qiagen) and total RNA was extracted using RNeasy plant  
675 mini kits (Qiagen, Hilden, Germany). To remove DNA, RNA samples were DNase treated using the  
676 DNA-free kit by Ambion (Life Technologies) following manufacturer instructions. The quantity of RNA  
677 was measured on a Nanodrop ND-1000 spectrophotometer and RNA integrity was measured on an  
678 Agilent 2100 BioAnalyser (Agilent Technologies). The RNA integrity number (RIN) provided by the  
679 BioAnalyzer software ranges from 1 (a very degraded sample) to 10 (a mostly intact sample).  
680 Samples with RIN numbers ≥8 were suitable for cDNA library preparation following the Illumina RNA  
681 prep protocols (Wellcome Trust Oxford Genomics Centre, Oxford). Illumina sequencing of 75 bp  
682 paired-end reads was conducted on the 90 cDNA libraries by an Illumina HiSeq4000. Samples were  
683 run over five lanes, and coverage was approximately 12 million reads per sample.

684

## 685 Read pre-processing and mapping to reference transcriptome

686 Raw reads were returned as fastq.gz files. These were unzipped and their quality was viewed using  
687 FastQC v.0.11.7. Illumina adaptors and low-quality tails were quality trimmed using Trimmomatic-

688 0.38 (62). Paired-end reads were interleaved, and ribosomal RNA was removed using Sortmerna-2.1  
689 (63) and error corrected using BayesHammer (SPAdes-3.10.0) (64) with setting—only-error-  
690 correction. Clean reads were mapped to a reference transcriptome (JGI 3.1, obtained from  
691 <https://marchantia.info/download/v31/>) using Salmon (65).

692

## 693 Differential expression analysis

694 The differences in expression of each gene per transcript between sample pairs were calculated  
695 using the DESeq 2 v.1.21.3 package (53) in the statistical software R. P-values were adjusted  
696 following the Benjamini-Hochberg procedure for controlling the false discovery rate (66). The criteria  
697 for differential gene expression was an adjusted p-value  $< 0.05$  and a  $|\log_2(\text{fold-change})| \geq 1$  (a fold-  
698 change of expression  $\geq 2$ ) between compared groups. Volcano plots were produced for each  
699 comparison. Expression differences were compared between untreated and treated Tak-2 2-48  
700 hours after chlorsulfuron treatment.

701

## 702 Gene Ontology term enrichment analysis

703 The VISEAGO R package (67) was used to identify GO terms significantly enriched in differentially  
704 expressed genes between treated and untreated plants, using the classic algorithm and Fisher's  
705 exact test. The functional annotations obtained from Marpolbase  
706 ([https://marchantia.info/download/MpTak\\_v6.1/](https://marchantia.info/download/MpTak_v6.1/)) for the MpTakv6.1 transcriptome were used to  
707 create a custom GO database, because the transcriptome used for the RNA-Seq analysis (JGI 3.1) is  
708 poorly annotated with a large number of obsolete GO annotations. Takv6.1 annotations were  
709 associated with JGI 3.1 gene names using the gene correspondence table provided by Marpolbase.  
710 Multidimensional plots were generated showing clusters of GO terms into functional groups based  
711 on Wang's semantic similarity distance and ward.D2 aggregation criterion.

712

## 713 Real time quantitative PCR validation of candidate genes

714 The RNA-Seq experimental setup was repeated with fewer timepoints for real time quantitative PCR  
715 (RT-qPCR) validation. Plants were transferred to control or herbicide treated plates eight days after  
716 growth and collected 6, 12, 24, and 36 hours after treatment. Samples were collected and RNA was  
717 extracted and DNase treated as described above. 1  $\mu$ g RNA was converted into cDNA using  
718 ProtoScript II RT (NEB), oligo(dT)s and Murine RNase inhibitor (NEB) in a 20  $\mu$ L reaction volume  
719 according to manufacturer instructions. Specific primers for the MpCYP and MpGST genes identified  
720 in the transcriptome analysis were designed using the Primer3Plus tool  
721 (<https://primer3plus.com/cgi-bin/dev/primer3plus.cgi>). MpAPT and MpACT were selected as  
722 reference genes (68). The list of primers used for RT-qPCR can be found below. Primer efficiencies  
723 were calculated for each primer pair by building a standard curve with a 1:5 dilution series of pooled  
724 cDNA (50, 10, 2, 0.4, 0.08 ng) and ranged between 1.8-2.2.

725 RT-qPCR experiments were performed with three biological replicates using a QuantStudio 7  
726 cycler (Applied Biosystems). The 10  $\mu$ l reaction mixture contained 5  $\mu$ l 2X SYBR Green/ROX master  
727 mix (Applied Biosystems), 2  $\mu$ l of 1:20 diluted cDNA, and 0.6  $\mu$ l each of the forward and reverse  
728 primer, and 2.4  $\mu$ l of RNase free water. Each biological replicate was run in two technical replicates.  
729 The QuantStudio7 cycling method was as follows: 50°C for 2 min, 95°C for 10 min, then 40 cycles of  
730 95°C for 15s and 60°C for 1 min. A melt curve analysis was conducted after PCR amplification to  
731 check primer specificity, with temperatures ranging from 60°C to 95°C increasing in 0.05°C s<sup>-1</sup>  
732 increments. Relative expression was calculated using an adapted 2<sup>- $\Delta\Delta$ Ct</sup> method that accounts for  
733 differences in primer efficiencies between the gene of interest and the reference gene(s), and  
734 incorporates multiple control genes (69). Technical replicate Ct values were averaged for each  
735 biological replicate. Each biological replicate Ct was then subtracted from the average Ct of the 3  
736 untreated biological replicates to give  $\Delta$ Ct values. The calculated primer efficiency of each primer



737 pair to the power of  $\Delta Ct$  gave the relative quantity (RQ). Expression of the gene of interest in each  
738 sample was calculated by dividing the RQ of that gene by the geometric mean of the RQ of the two  
739 reference genes in the same sample to give the normalised relative quantity (NRQ) (70). Significant  
740 differences between treated and untreated groups for each gene and timepoint were calculated by  
741 Student's t-tests.

742

### 743 **Vector construction for the generation of MpCYP and MpGST overexpression alleles**

744 DNA was extracted from the Tak-2 wild-type line using a CTAB extraction method adapted from (59).  
745 Each of the up-regulated genes (MpGSTF7, MpGSTF10, MpGSTF15, MpCYP813A5, MpCYP822A1) was  
746 PCR amplified from genomic Tak-2 DNA using CloneAmp HiFi Premix (Takara Bio). The primers used  
747 to amplify gene sequences are listed below. PCR products were run on 1% agarose gel and  
748 fragments of the correct size were extracted and purified using the GeneJET Gel Extraction Kit  
749 (ThermoFisher) following manufacturer instructions. The purified products were individually cloned  
750 into a directional entry vector pENTR D-TOPO (ThermoFisher) and transformed into *E. coli*. The  
751 plasmid was extracted and purified using a Minprep Kit (Qiagen), and then cloned by LR reaction into  
752 destination vector pMpGWB403 carrying the constitutive endogenous elongation factor alpha  
753 (MpEF1 $\alpha$ ) promoter (71). The final vectors were transformed into *Agrobacterium tumefaciens*  
754 (GV3101) by electroporation. *Agrobacterium*-mediated transformation of *M. polymorpha* spores  
755 followed previously described methods (55).

756

### 757 **Real time quantitative PCR of MpGST and MpCYP overexpression** 758 **transformants**

759 RNA was extracted from 14-day old gemmalings from five independent lines transformed with an  
760 overexpression construct containing one of five chlorsulfuron-induced genes (MpGSTF7, MpGSTF10,

761 *MpGSTF15*, *MpCYP813A5*, *MpCYP822A1*). RNA was extracted using the RNeasy plant mini kit  
762 (Qiagen, Hilden, Germany). RNA samples were DNase treated using the DNA-free kit by Ambion (Life  
763 Technologies) according to manufacturer instructions. RNA was converted to cDNA as described in  
764 the transcriptome analysis. The primers used for RT-qPCR are listed below. RT-qPCR experiments  
765 were performed with three biological replicates using a QuantStudio7 cycler (Applied Biosystems).  
766 Each biological replicate sample was run in two technical replicates. The reaction mixture, cycling  
767 method and relative expression calculations were conducted as described in the transcriptome  
768 analysis.

769

## 770 Herbicide sensitivity assay of *MpGST* and *MpCYP* overexpression lines

771 To characterise the sensitivity of *MpGST*- and *MpCYP*- over-expressing plants to chlorsulfuron,  
772 gemmae over-expressing one of the four candidate genes (*MpGSTF7*, *MpGSTF10*, *MpCYP813A5* and  
773 *MpCYP822A1*) and from an empty vector control were grown on medium supplemented with 30nM  
774 chlorsulfuron (non-lethal dose), 200 nM chlorsulfuron (lethal dose) or no herbicide. Significant  
775 differences in growth between each line and the empty vector control within each treatment were  
776 calculated by Student's t-tests.

777

## 778 Primers

| Gene         | Experiment         | Forward primer (5' to 3')        | Reverse primer (5' to 3')        | Product size (bp) |
|--------------|--------------------|----------------------------------|----------------------------------|-------------------|
| <i>MpALS</i> | PCR amplification  | TCATTGGTGTATAATCGTTGAAGTGG       | AGGTAATTGTGCTTGGTGATCG           | 291               |
|              | Sequencing         | TTGGTCCGACTCATCATTTG             |                                  |                   |
|              | CRISPR-Cas9 gRNA_F | <u>CTCG</u> CTCTGAGGGGACATGCATAC | <u>AAAC</u> GTATGCATGTCCCCTCAGAG |                   |
|              | CRISPR-Cas9 gRNA_W | <u>CTCG</u> TTCTGCCTATGATTCCTGG  | <u>AAAC</u> CCAGGAATCATAGGCAGAA  |                   |
|              | Genotyping gRNA_F  | TATTGCTATCTCGCGCTGTGT            | CTGGAACGTGTAAGAGCCTG             | 648               |
|              | Genotyping gRNA_W  | TGTCAGGGATGGACAGTATGG            | GGACAAGGCTACCTCTCAATGT           | 537               |
| <i>MpACT</i> | qPCR               | AGGCATCTGGTATCCACGAG             | ACATGGTCGTTCTCCAGAC              | 108               |
| <i>MpAPT</i> | qPCR               | CGAAAGCCCAAGAAGCTACC             | GTACCCCGGTTGCAATAAG              | 146               |

|             |                |                               |                              |      |
|-------------|----------------|-------------------------------|------------------------------|------|
| MpCYP73A109 | qPCR           | GCAAACAACCCGAACTG             | ACAGCGGAATGGCGATGATG         | 154  |
| MpCYP73A110 | qPCR           | GAAAGACCAGGGCAATCGA           | GAATCACCATCAGCGTTGCC         | 145  |
| MpCYP94L1   | qPCR           | AGCGATGGTGTGACATTCA           | GTACCAGTTTGTCTCGGCT          | 122  |
| MpCYP704AH1 | qPCR           | ACCTGCGACGGAACATCTT           | CAGCTGCCGTTGATTCACAC         | 125  |
| MpCYP704N1  | qPCR           | CCGGATGGCACCCGTATTAA          | CTGGTTGGAAGACTCCGTCC         | 139  |
| MpCYP710A16 | qPCR           | TCCAATGACCATGCGGCTAC          | GCTTCGTGGTATGCAAAGCC         | 177  |
| MpCYP813A5  | qPCR           | CGATGGTACGGTGGTCTTG           | AATCAGAAGTGCTGACGCGA         | 129  |
|             | Overexpression | <u>CACCTCGGGTAAGACTGGTC</u>   | TAGCAGTCAGGCCAGGATAT         | 2892 |
| MpCYP822A1  | qPCR           | CCACACGTGAACATGGAGGA          | GCTTGAGCACAAAAGGGTCCG        | 127  |
| MpCYP822B2  | qPCR           | GTTGTGGTGTAGGGAAGCA           | GTGAGAACGGGGATAGCTCG         | 110  |
|             | Overexpression | <u>CACCATGGAGAATGCTACGTTT</u> | CGGCTGTGCCAATGAATTCTA        | 2113 |
| MpCYP823A2  | qPCR           | ACAAGGACGCGATGGACTTC          | CCTGCCAAAACCATGTCGTG         | 109  |
| MpCYP829E1  | qPCR           | TGAGTGTGTGGCAGCCTTAG          | TTTCGTGCGGGCTCAATGA          | 94   |
| MpGSTF7     | qPCR           | ATACAACGGCCAAGGCAAGA          | TCTGTCACGCCCTAGATGGA         | 92   |
|             | Overexpression | <u>CACCATGGCGATCAAGATTCAT</u> | AGCTTCAATTCGACAGTGATTCA      | 1189 |
| MpGSTF8     | qPCR           | TCACTATCGAATGGTAGTTGCA        | ATGCAGGAAAGCCCTCAAGG         | 142  |
|             | Overexpression | <u>CACCATGGCGATCAAGATTCAT</u> | CACAAAGAGTCTTAGCGGCCG        | 1246 |
| MpGSTF10    | qPCR           | GGGTCAAGGTAAGTCTCTGT          | TTCTGAGTTCCTCCCGAT           | 123  |
|             | Overexpression | <u>CACCATGGCGAACACGATTTTT</u> | CGATCGATGTCAATAATTGTTGGTGTA  | 1093 |
| MpGSTF15    | qPCR           | ATCGGGATATTTCCAGGGCATG        | GTTCAAGAGGCGTGCTGAAAG        | 105  |
|             | Overexpression | <u>CACCATGGCCATTCAGATCTAT</u> | <b>TCAT</b> GGGATATGCTCTCCAG | 1544 |
| MpGSTH1     | qPCR           | CGCTCAGACTGTATGGCGAT          | TCTGCGTCCACTCTTTGTCC         | 114  |

779 The overhangs for CRISPR-Cas9 and Gateway cloning are underlined. Start and stop codons are in  
780 bold.

781

## 782 Acknowledgments

783 We are grateful to Phil Poole, Laura Moody and Nick Kruger for suggestions. We are grateful to  
784 Simon Engledow for his help with processing the RNA-Seq samples. We thank Pippa Sinclair for  
785 laboratory assistance during the project. We thank Matt Watson for comments on the manuscript.  
786 We thank David Nelson from the University of Tennessee Health Science Center, who helped us with  
787 cytochrome P450 nomenclature.

788

## 789 References

- 790 1. Wang Y-M, Ong SS, Chai SC, Chen T. Role of CAR and PXR in xenobiotic sensing and  
791 metabolism. *Expert Opin Drug Metab Toxicol.* 2012 Jul;8(7):803.
- 792 2. Handschin C, Meyer UA. Induction of Drug Metabolism: The Role of Nuclear Receptors.  
793 *Pharmacol Rev.* 2003 Dec 1;55(4):649–73.
- 794 3. Morant M, Bak S, Møller BL, Werck-Reichhart D. Plant cytochromes P450: tools for  
795 pharmacology, plant protection and phytoremediation. *Curr Opin Biotechnol.* 2003 Apr  
796 1;14(2):151–62.
- 797 4. Bai S, Liu W, Wang H, Zhao N, Jia S, Zou N, et al. Enhanced herbicide metabolism and  
798 metabolic resistance genes identified in tribenuron-methyl resistant *Myosoton aquaticum* L. J  
799 *Agric Food Chem.* 2018;66:9850–7.
- 800 5. Piasecki C, Yang Y, Benemann DP, Kremer FS, Galli V, Millwood RJ, et al. Transcriptomic  
801 analysis identifies new non-target site glyphosate-resistance genes in *Conyza bonariensis*.  
802 *Plants.* 2019 Jun 7;8(6):157.
- 803 6. Matzrafi M, Shaar-Moshe L, Rubin B, Peleg Z. Unraveling the Transcriptional Basis of  
804 Temperature-Dependent Pinoxaden Resistance in *Brachypodium hybridum*. *Front Plant Sci.*  
805 2017 Jun 21;8:1064.
- 806 7. Iwakami S, Uchino A, Kataoka Y, Shibaie H, Watanabe H, Inamura T. Cytochrome P450 genes  
807 induced by bispyribac-sodium treatment in a multiple-herbicide-resistant biotype of  
808 *Echinochloa phyllopogon*. *Pest Manag Sci.* 2014 Apr 1;70(4):549–58.
- 809 8. Wang J, Chen J, Li X, Cui H. RNA-Seq transcriptome analysis to identify candidate genes  
810 involved in non-target site-based mesosulfuron-methyl resistance in *Beckmannia syzigachne*.  
811 *Pestic Biochem Physiol.* 2021 Jan 1;171:104738.

- 812 9. Leslie T, Baucom RS. De novo assembly and annotation of the transcriptome of the  
813 agricultural weed *Ipomoea purpurea* uncovers gene expression changes associated with  
814 herbicide resistance. *G3 Genes, Genomes, Genet.* 2014 Oct 1;4(10):2035–47.
- 815 10. Zhao N, Li W, Bai S, Guo W, Yuan G, Wang F, et al. Transcriptome profiling to identify genes  
816 involved in mesosulfuron-methyl resistance in *Alopecurus aequalis*. *Front Plant Sci.* 2017 Aug  
817 9;8:1391.
- 818 11. Franco-Ortega S, Goldberg-Cavalleri A, Walker A, Brazier-Hicks M, Onkokesung N, Edwards R.  
819 Non-target site herbicide resistance is conferred by two distinct mechanisms in black-grass  
820 (*Alopecurus myosuroides*). *Front Plant Sci.* 2021 Mar 3;12:636652.
- 821 12. Liu W, Bai S, Zhao N, Jia S, Li W, Zhang L, et al. Non-target site-based resistance to tribenuron-  
822 methyl and essential involved genes in *Myosoton aquaticum* (L.). *BMC Plant Biol.* 2018 Oct  
823 11;18(1):225.
- 824 13. Cabello-Hurtado F, Batard Y, Salaün JP, Durst F, Pinot F, Werck-Reichhart D. Cloning,  
825 expression in yeast, and functional characterization of CYP81B1, a plant cytochrome P450  
826 that catalyzes in-chain hydroxylation of fatty acids. *J Biol Chem.* 1998 Mar 27;273(13):7260–7.
- 827 14. Han H, Yu Q, Beffa R, González S, Maiwald F, Wang J, et al. Cytochrome P450 CYP81A10v7 in  
828 *Lolium rigidum* confers metabolic resistance to herbicides across at least five modes of  
829 action. *Plant J.* 2021 Jan 27;105(1):79–92.
- 830 15. Gaines TA, Lorentz L, Figge A, Herrmann J, Maiwald F, Ott M-C, et al. RNA-Seq transcriptome  
831 analysis to identify genes involved in metabolism-based diclofop resistance in *Lolium rigidum*.  
832 *Plant J.* 2014 Jun;78(5):865–76.
- 833 16. Duhoux A, Carrère S, Gouzy J, Bonin L, Délye C. RNA-Seq analysis of rye-grass transcriptomic  
834 response to an herbicide inhibiting acetolactate-synthase identifies transcripts linked to non-  
835 target-site-based resistance. *Plant Mol Biol.* 2015 Mar 31;87(4–5):473–87.

- 836 17. Duhoux A, Carrère S, Duhoux A, Délye C. Transcriptional markers enable identification of rye-  
837 grass (*Lolium* sp.) plants with non-target-site-based resistance to herbicides inhibiting  
838 acetolactate-synthase. *Plant Sci.* 2017 Apr 1;257:22–36.
- 839 18. Pan L, Gao H, Xia W, Zhang T, Dong L. Establishing a herbicide-metabolizing enzyme library in  
840 *Beckmannia syzigachne* to identify genes associated with metabolic resistance. *J Exp Bot.*  
841 2016 Mar 1;67(6):1745–57.
- 842 19. Salas-Perez RA, Saski CA, Noorai RE, Srivastava SK, Lawton-Rauh AL, Nichols RL, et al. RNA-Seq  
843 transcriptome analysis of *Amaranthus palmeri* with differential tolerance to glufosinate  
844 herbicide. *PLoS One.* 2018;13:1–33.
- 845 20. Thyssen GN, Naoumkina M, McCarty JC, Jenkins JN, Florane C, Li P, et al. The P450 gene  
846 CYP749A16 is required for tolerance to the sulfonylurea herbicide trifloxysulfuron sodium in  
847 cotton (*Gossypium hirsutum* L.). *BMC Plant Biol.* 2018 Dec 10;18(1):186.
- 848 21. Zhao N, Yan Y, Liu W, Wang J. Cytochrome P450 CYP709C56 metabolizing mesosulfuron-  
849 methyl confers herbicide resistance in *Alopecurus aequalis*. *Cell Mol Life Sci.* 2022 Apr  
850 1;79(4):1–14.
- 851 22. Iwakami S, Endo M, Saika H, Okuno J, Nakamura N, Yokoyama M, et al. Cytochrome P450  
852 CYP81A12 and CYP81A21 are associated with resistance to two acetolactate synthase  
853 inhibitors in *Echinochloa phyllopogon*. *Plant Physiol.* 2014 Jun 1;165(2):618–29.
- 854 23. Yanniccari M, Gigón R, Larsen A. Cytochrome P450 Herbicide Metabolism as the Main  
855 Mechanism of Cross-Resistance to ACCase- and ALS-Inhibitors in *Lolium* spp. Populations  
856 From Argentina: A Molecular Approach in Characterization and Detection. *Front Plant Sci.*  
857 2020 Nov 16;11:1813.
- 858 24. Dimaano NG, Yamaguchi T, Fukunishi K, Tominaga T, Iwakami S. Functional characterization  
859 of cytochrome P450 CYP81A subfamily to disclose the pattern of cross-resistance in

- 860 *Echinochloa phyllopogon*. Plant Mol Biol. 2020 Mar 1;102(4–5):403–16.
- 861 25. Iwakami S, Kamidate Y, Yamaguchi T, Ishizaka M, Endo M, Suda H, et al. CYP81A P450s are  
862 involved in concomitant cross-resistance to acetolactate synthase and acetyl-CoA carboxylase  
863 herbicides in *Echinochloa phyllopogon*. New Phytol. 2019 Mar 1;221(4):2112–22.
- 864 26. Ramel F, Sulmon C, Serra A-A, Gouesbet G, Couée I. Xenobiotic sensing and signalling in  
865 higher plants. J Exp Bot. 2012 Jun 28;63(11):3999–4014.
- 866 27. Alberto D, Serra AA, Sulmon C, Gouesbet G, Couée I. Herbicide-related signaling in plants  
867 reveals novel insights for herbicide use strategies, environmental risk assessment and global  
868 change assessment challenges. Vols. 569–570, Science of the Total Environment. Elsevier  
869 B.V.; 2016. p. 1618–28.
- 870 28. Ray TB. The mode of action of chlorsulfuron: A new herbicide for cereals. Pestic Biochem  
871 Physiol. 1982 Feb 1;17(1):10–7.
- 872 29. Ray TB. Site of Action of Chlorsulfuron. Plant Physiol. 1984 Jul;75(3):827–31.
- 873 30. Rhodes D, Hogan AL, Deal L, Jamieson GC, Haworth P. Amino Acid Metabolism of *Lemna*  
874 *minor* L. Plant Physiol. 1987 Jul 1;84(3):775–80.
- 875 31. Zabalza A, Orcaray L, Igal M, Schauer N, Fernie AR, Geigenberger P, et al. Unraveling the role  
876 of fermentation in the mode of action of acetolactate synthase inhibitors by metabolic  
877 profiling. J Plant Physiol. 2011 Sep 1;168(13):1568–75.
- 878 32. Scheel D, Casida JE. Sulfonylurea herbicides: Growth inhibition in soybean cell suspension  
879 cultures and in bacteria correlated with block in biosynthesis of valine, leucine, or isoleucine.  
880 Pestic Biochem Physiol. 1985 Jun 1;23(3):398–412.
- 881 33. Shaner DL, Singh BK. Phytotoxicity of Acetohydroxyacid Synthase Inhibitors Is Not Due to  
882 Accumulation of 2-Ketobutyrate and/or 2-Aminobutyrate. Plant Physiol. 1993 Dec

- 883 1;103(4):1221–6.
- 884 34. Huang T, Jander G. Abscisic acid-regulated protein degradation causes osmotic stress-induced  
885 accumulation of branched-chain amino acids in *Arabidopsis thaliana*. *Planta*. 2017 Oct  
886 1;246(4):737–47.
- 887 35. Orcaray L, Igal M, Marino D, Zabalza A, Royuela M. The possible role of quinate in the mode  
888 of action of glyphosate and acetolactate synthase inhibitors. *Pest Manag Sci*. 2010 Mar  
889 1;66(3):262–9.
- 890 36. Trenkamp S, Eckes P, Busch M, Fernie AR. Temporally resolved GC-MS-based metabolic  
891 profiling of herbicide treated plants treated reveals that changes in polar primary metabolites  
892 alone can distinguish herbicides of differing mode of action. *Metabolomics*. 2009 Dec  
893 13;5(3):277–91.
- 894 37. Heap I. The International Survey of Herbicide Resistant Weeds [Internet]. 2021. Available  
895 from: [www.weedscience.org](http://www.weedscience.org)
- 896 38. Tranel PJ, Wright TR. Resistance of weeds to ALS-inhibiting herbicides: what have we  
897 learned? *Weed Sci*. 2002;50:700–12.
- 898 39. Yu Q, Powles SB. Resistance to AHAS inhibitor herbicides: current understanding. *Pest Manag*  
899 *Sci*. 2014 Sep;70(9):1340–50.
- 900 40. McCourt JA, Pang SS, King-Scott J, Guddat LW, Duggleby RG. Herbicide-binding sites revealed  
901 in the structure of plant acetoxyacid synthase. *Proc Natl Acad Sci*. 2006;103(3):569–73.
- 902 41. Liu W, Yuan G, Du L, Guo W, Li L, Bi Y, et al. A novel Pro197Glu substitution in acetolactate  
903 synthase (ALS) confers broad-spectrum resistance across ALS inhibitors. *Pestic Biochem*  
904 *Physiol*. 2015 Jan 1;117:31–8.
- 905 42. Liu W, Bi Y, Li L, Yuan G, Du L, Wang J. Target-site basis for resistance to acetolactate synthase



- 906 inhibitor in Water chickweed (*Myosoton aquaticum* L.). Pestic Biochem Physiol. 2013 Sep  
907 1;107(1):50–4.
- 908 43. Rey-Caballero J, Menéndez J, Osuna MD, Salas M, Torra J. Target-site and non-target-site  
909 resistance mechanisms to ALS inhibiting herbicides in *Papaver rhoeas*. Pestic Biochem  
910 Physiol. 2017 May 1;138:57–65.
- 911 44. Yuan JS, Tranel PJ, Stewart CN. Non-target-site herbicide resistance: a family business. Trends  
912 Plant Sci. 2007 Jan 1;12(1):6–13.
- 913 45. Newby A, Altland JE, Gilliam CH, Wehtje G. Pre-emergence Liverwort Control in Nursery  
914 Containers. Horttechnology. 2007 Jan 1;17(4):496–500.
- 915 46. Sidhu MK, Lopez RG, Chaudhari S, Saha D. A Review of Common Liverwort Control Practices in  
916 Container Nurseries and Greenhouse Operations. Horttechnology. 2020 Aug 1;30(4):471–9.
- 917 47. Yang Q, Deng W, Li X, Yu Q, Bai L, Zheng M. Target-site and non-target-site based resistance  
918 to the herbicide tribenuron-methyl in flixweed (*Descurainia sophia* L.). BMC Genomics.  
919 2016;17(1):17:551.
- 920 48. Rojano-Delgado AM, Portugal JM, Palma-Bautista C, Alcántara-de la Cruz R, Torra J, Alcántara  
921 E, et al. Target site as the main mechanism of resistance to imazamox in a *Euphorbia*  
922 *heterophylla* biotype. Sci Rep. 2019 Dec 1;9(1).
- 923 49. Casey A, Dolan L. Genes encoding cytochrome P450 monooxygenases and glutathione S-  
924 transferases associated with herbicide resistance evolved before the origin of land plants.  
925 bioRxiv. 2022 Aug 15;2022.08.12.503801.
- 926 50. Dimaano NG, Iwakami S. Cytochrome P450-mediated herbicide metabolism in plants: current  
927 understanding and prospects. Pest Manag Sci. 2021 Jan 31;77(1):22–32.
- 928 51. Siminszky B. Plant cytochrome P450-mediated herbicide metabolism. Vol. 5, Phytochemistry

- 929           Reviews. 2006. p. 445–58.
- 930    52.    Cummins I, Dixon DP, Freitag-Pohl S, Skipsey M, Edwards R. Multiple roles for plant  
931           glutathione transferases in xenobiotic detoxification. *Drug Metab Rev.* 2011;43(2):266–80.
- 932    53.    Love MI, Huber W, Anders S. Moderated estimation of fold change and dispersion for RNA-  
933           seq data with DESeq2. *Genome Biol.* 2014;15(12):550.
- 934    54.    Délye C, Duhoux A, Gardin JAC, Gouzy J, Carrère S. High conservation of the transcriptional  
935           response to acetolactate-synthase-inhibiting herbicides across plant species. Iannetta P,  
936           editor. *Weed Res.* 2018 Feb 1;58(1):2–7.
- 937    55.    Ishizaki K, Chiyoda S, Yamato KT, Kohchi T. Agrobacterium-mediated transformation of the  
938           haploid liverwort *Marchantia polymorpha* L., an emerging model for plant biology. *Plant Cell*  
939           *Physiol.* 2008;49(7):1084–91.
- 940    56.    Johnson CM, Stout PR, Broyer TC, Carlton AB. Comparative chlorine requirements of different  
941           plant species. *Plant Soil.* 1957;8:337–53.
- 942    57.    Gamborg OL, Miller RA, Ojima K. Nutrient requirements of suspension cultures of soybean  
943           root cells. *Exp Cell Res.* 1968 Apr 1;50(1):151–8.
- 944    58.    Chiyoda S, Ishizaki K, Kataoka H, Yamato KT, Kohchi T. Direct transformation of the liverwort  
945           *Marchantia polymorpha* L. by particle bombardment using immature thalli developing from  
946           spores. *Plant Cell Rep.* 2008 Sep 14;27(9):1467–73.
- 947    59.    Porebski S, Bailey LG, Baum BR. Modification of a CTAB DNA extraction protocol for plants  
948           containing high polysaccharide and polyphenol components. Vol. 15, *Plant Molecular Biology*  
949           Reporter. International Society for Plant Molecular Biology; 1997. p. 8–15.
- 950    60.    Sugano SS, Shirakawa M, Takagi J, Matsuda Y, Shimada T, Hara-Nishimura I, et al.  
951           CRISPR/Cas9-Mediated Targeted Mutagenesis in the Liverwort *Marchantia polymorpha* L.

- 952 Plant Cell Physiol. 2014 Mar 1;55(3):475–81.
- 953 61. Lei Y, Lu L, Liu HY, Li S, Xing F, Chen LL. CRISPR-P: A web tool for synthetic single-guide RNA  
954 design of CRISPR-system in plants. Vol. 7, Molecular Plant. Cell Press; 2014. p. 1494–6.
- 955 62. Bolger AM, Lohse M, Usadel B. Trimmomatic: a flexible trimmer for Illumina sequence data.  
956 Bioinformatics. 2014 Aug 1;30(15):2114–20.
- 957 63. Kopylova E, Noé L, Touzet H. SortMeRNA: fast and accurate filtering of ribosomal RNAs in  
958 metatranscriptomic data. Bioinformatics. 2012 Dec 1;28(24):3211–7.
- 959 64. Nikolenko SI, Korobeynikov AI, Alekseyev MA. BayesHammer: Bayesian clustering for error  
960 correction in single-cell sequencing. BMC Genomics. 2013 Jan 21;14(Suppl 1):S7.
- 961 65. Patro R, Duggal G, Love MI, Irizarry RA, Kingsford C. Salmon provides fast and bias-aware  
962 quantification of transcript expression. Nat Methods. 2017 Apr 6;14(4):417–9.
- 963 66. Benjamini Y, Hochberg Y. Controlling the false discovery rate: a practical and powerful  
964 approach to multiple testing. Vol. 57, Journal of the Royal Statistical Society. 1995.
- 965 67. Brionne A, Juanchich A, Hennequet-Antier C. ViSEAGO: A Bioconductor package for clustering  
966 biological functions using Gene Ontology and semantic similarity. BioData Min. 2019 Aug  
967 6;12(1).
- 968 68. Saint-Marcoux D, Proust H, Dolan L, Langdale JA. Identification of Reference Genes for Real-  
969 Time Quantitative PCR Experiments in the Liverwort *Marchantia polymorpha*. Margis R,  
970 editor. PLoS One. 2015 Mar 23;10(3):e0118678.
- 971 69. Hellemans J, Mortier G, De Paepe A, Speleman F, Vandesompele J. qBase relative  
972 quantification framework and software for management and automated analysis of real-time  
973 quantitative PCR data. Genome Biol. 2008 Feb 9;8(2):R19.
- 974 70. Vandesompele J, De Preter K, Pattyn F, Poppe B, Van Roy N, De Paepe A, et al. Accurate

975 normalization of real-time quantitative RT-PCR data by geometric averaging of multiple  
976 internal control genes. *Genome Biol.* 2002;3(7):research0034.1.

977 71. Ishizaki K, Nishihama R, Ueda M, Inoue K, Ishida S, Nishimura Y, et al. Development of  
978 Gateway Binary Vector Series with Four Different Selection Markers for the Liverwort  
979 *Marchantia polymorpha*. Ezura H, editor. *PLoS One*. 2015 Sep 25;10(9):e0138876.

## 980 Supporting Information

981 **Table S1. List of metabolites detected in both RP and HILIC untargeted metabolomics analyses of**  
982 **chlorsulfuron-treated *M. polymorpha* (Fig 4C-E).** Showing metabolite name, molecular weight  
983 (MW), retention time (RT), normalized peak area,  $\text{Log}_2$ (fold change),  $p$ -value and adjusted  $p$ -value for  
984 each sample. C1-C6 are control samples. H1-H6 are herbicide-treated samples.

**A**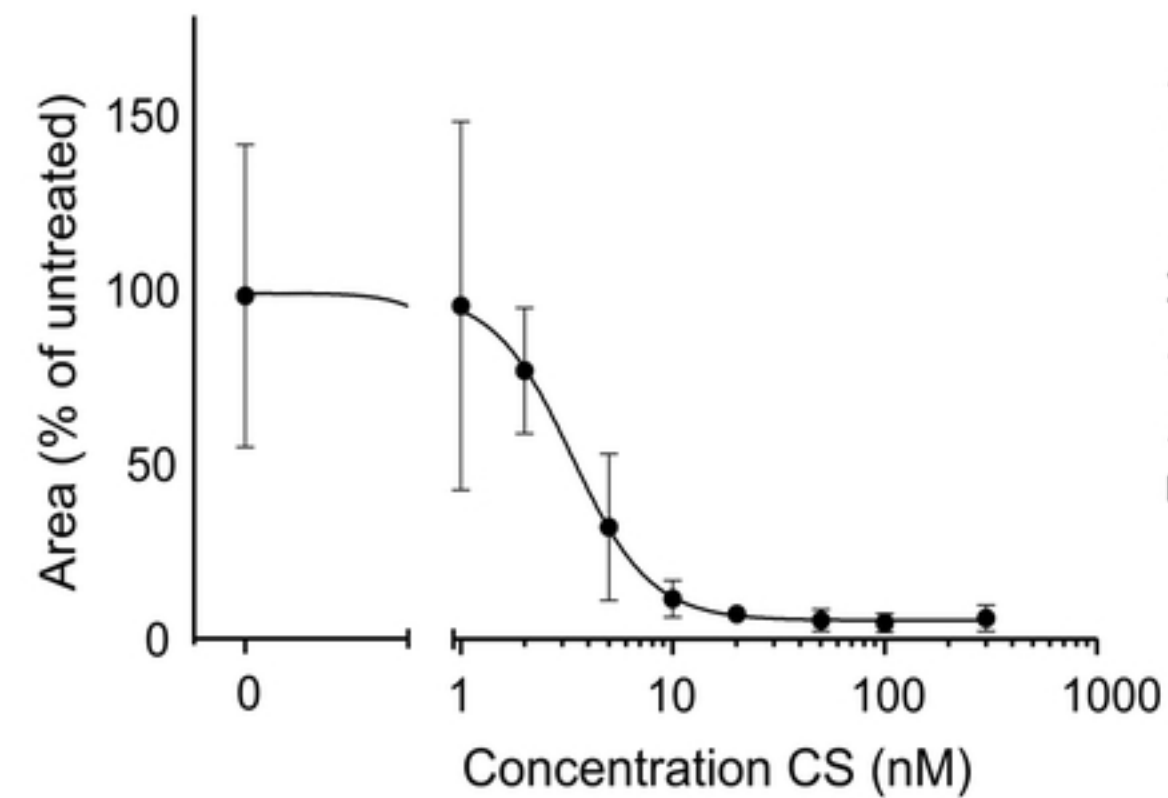**B**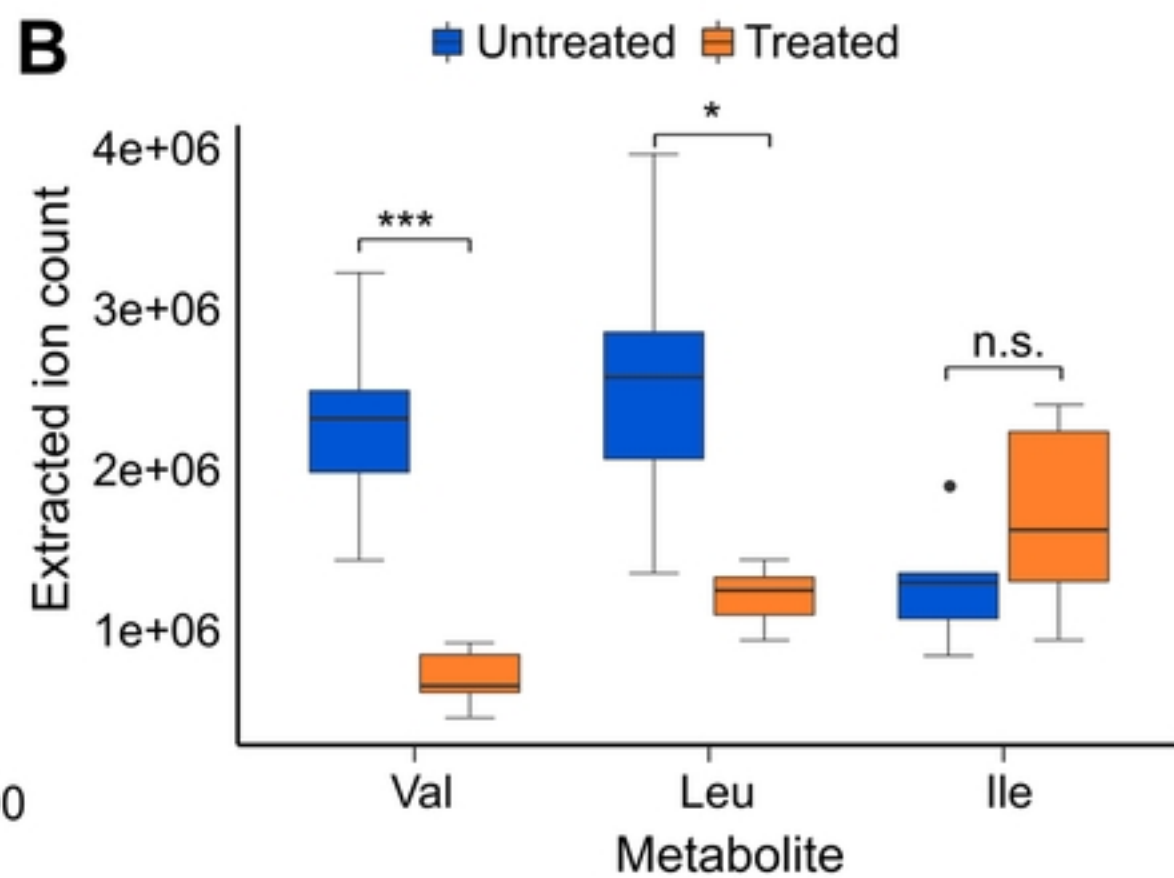**C**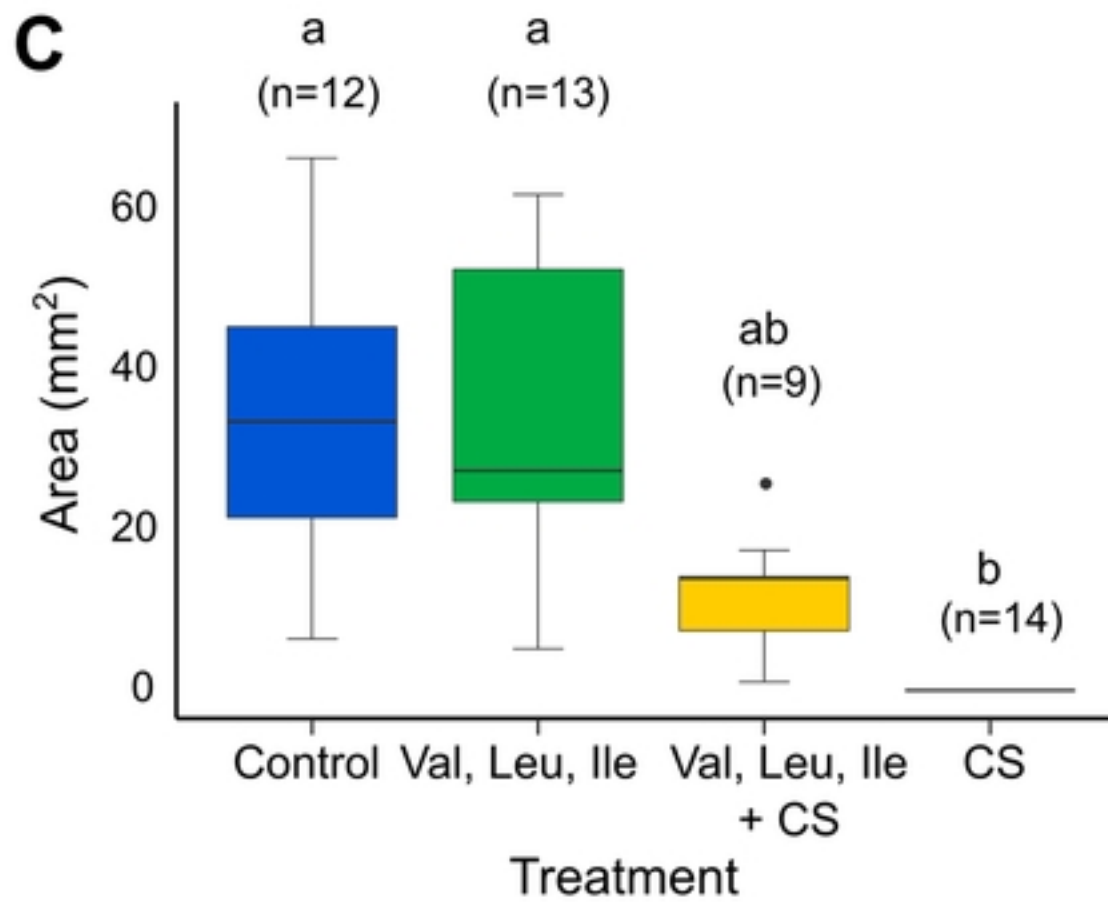

**A**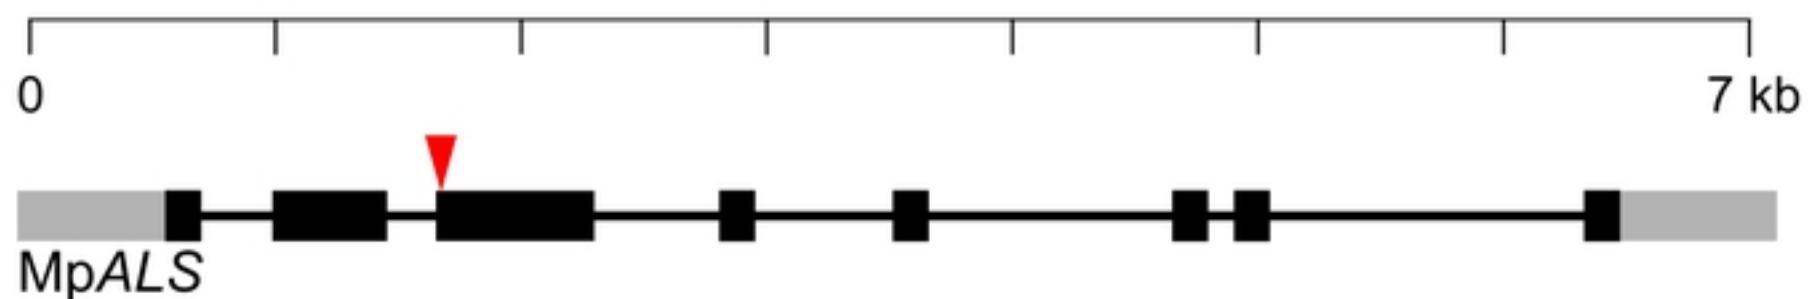**B**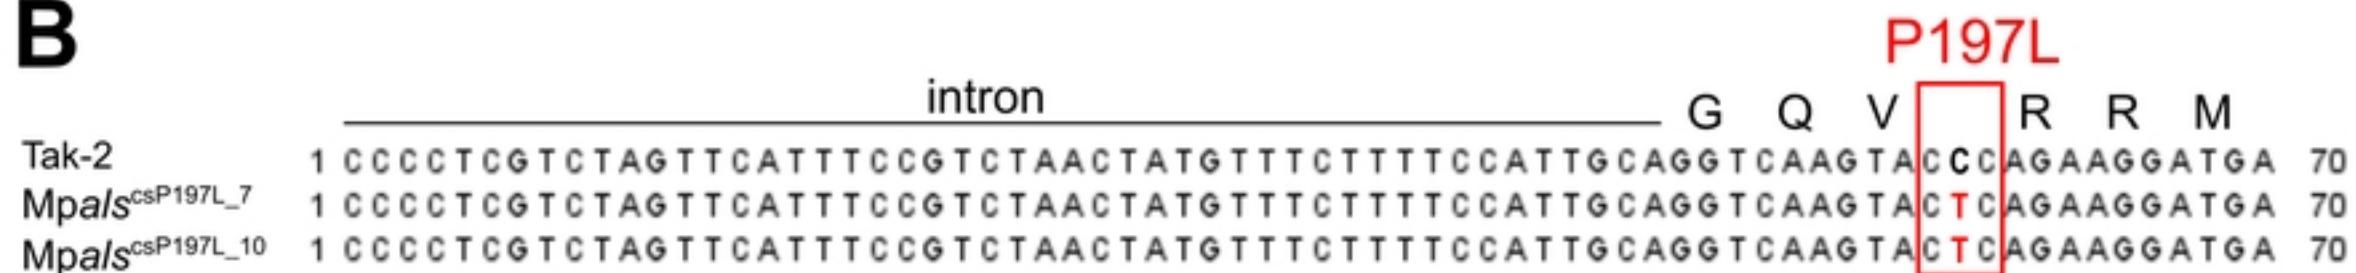**C**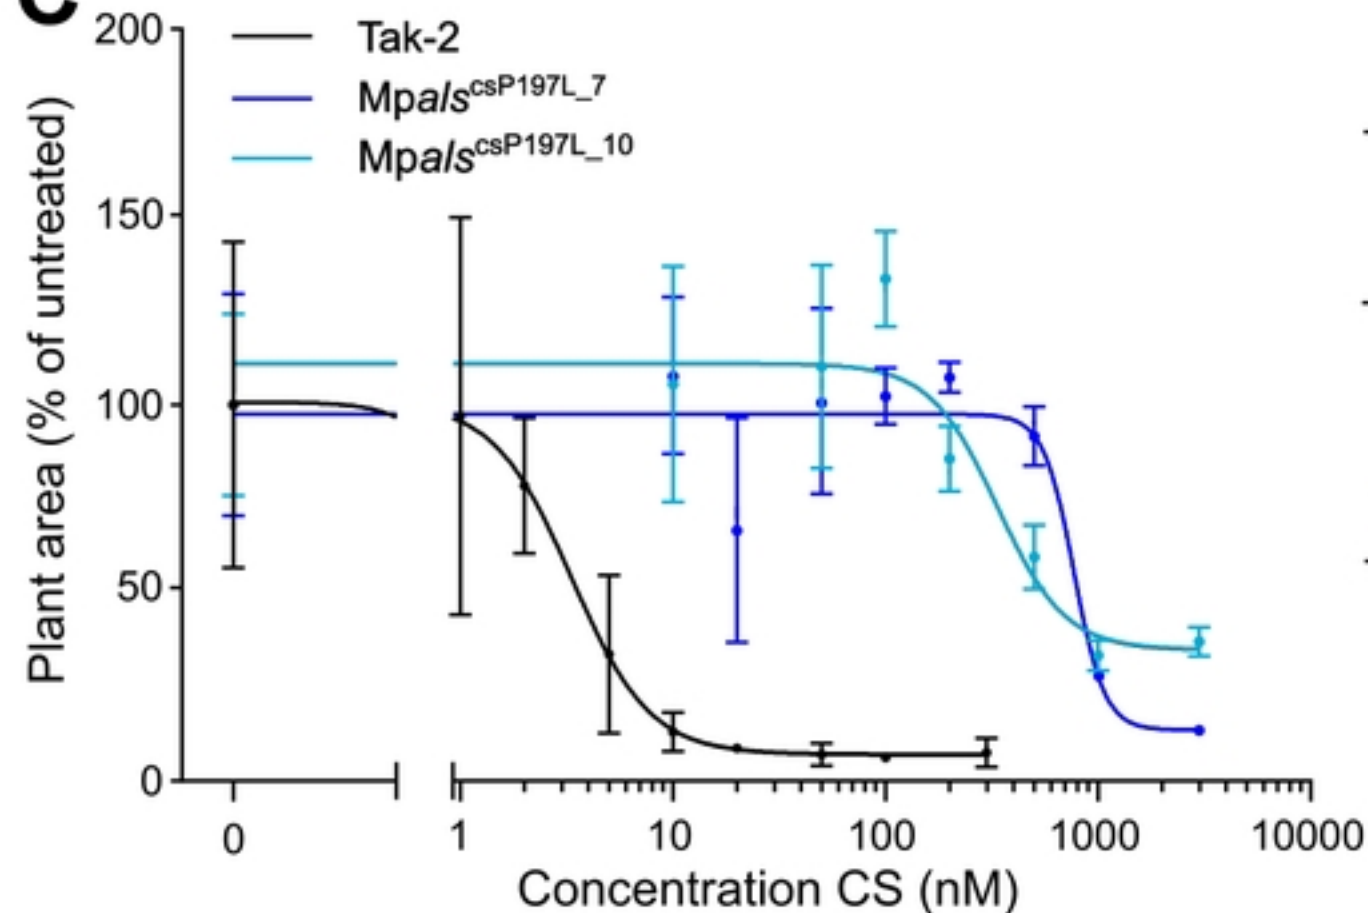

| Genotype                           | GR <sub>50</sub> (nM) | RI (GR <sub>50</sub> [R/S]) |
|------------------------------------|-----------------------|-----------------------------|
| Tak-2                              | 3.3 ± 0.5             | 1                           |
| <i>Mpals</i> <sup>csP197L_7</sup>  | 771.9 ± 89.2          | 233.9 ± 69.4                |
| <i>Mpals</i> <sup>csP197L_10</sup> | 363.9 ± 77.4          | 100.6 ± 57.0                |

**A**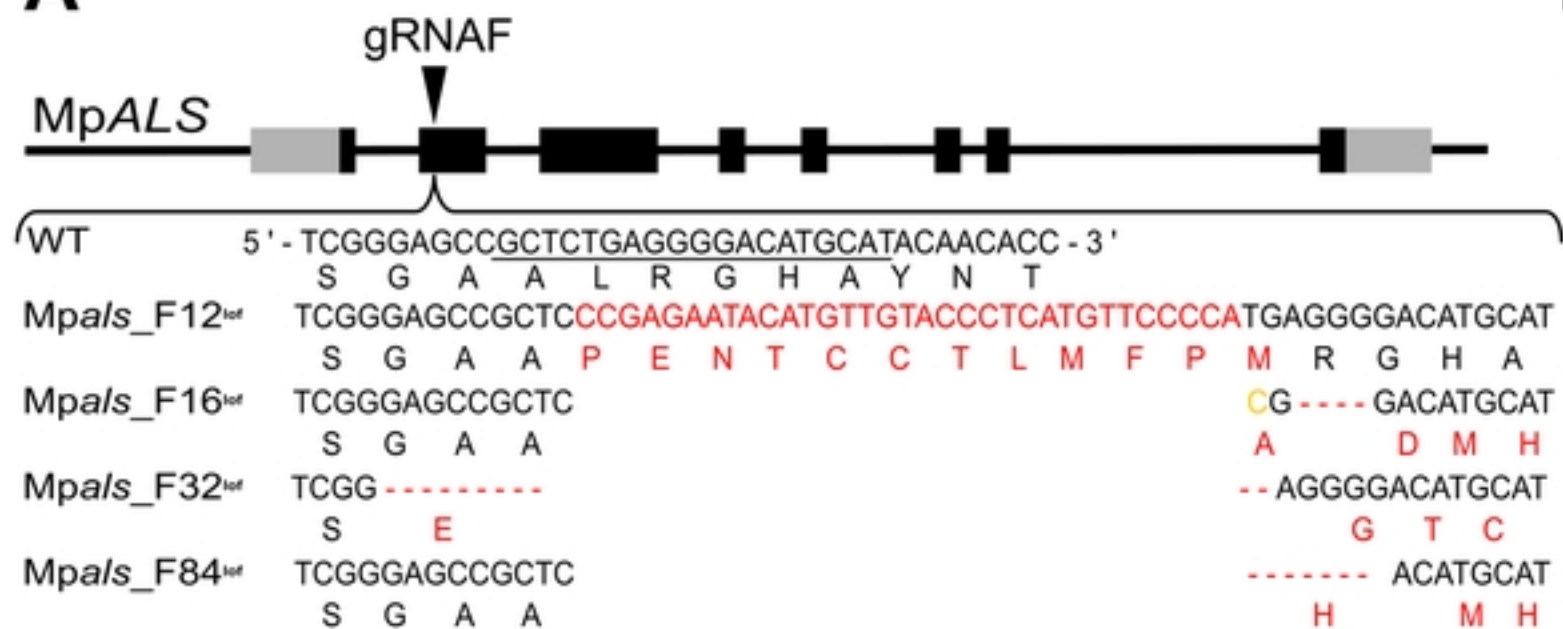**B**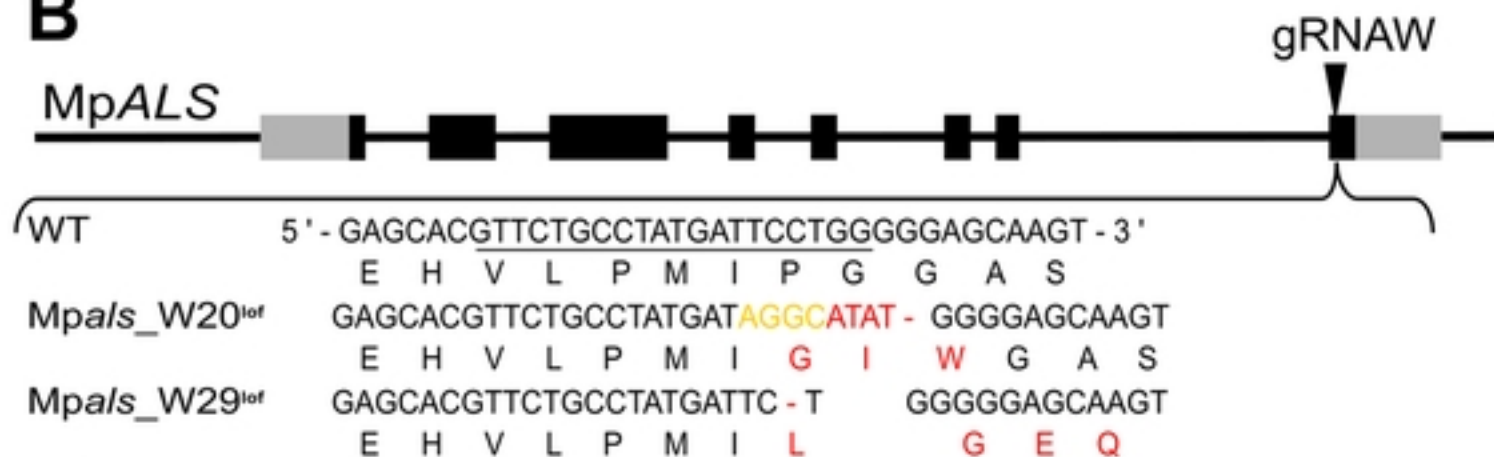**C**

| Mpals <sup>lof</sup> line | DNA sequence change                                                 | Protein sequence change                          |
|---------------------------|---------------------------------------------------------------------|--------------------------------------------------|
| F12                       | 36bp insertion in 2 <sup>nd</sup> exon                              | 12 aa insertion (in frame)                       |
| F16                       | T>C mutation, 4bp deletion in 2 <sup>nd</sup> exon                  | Frameshift, truncation 17 aa downstream          |
| F32                       | 11bp deletion in 2 <sup>nd</sup> exon                               | Frameshift, truncation 12 aa downstream          |
| F84                       | 7bp deletion in 2 <sup>nd</sup> exon                                | Frameshift, truncation 14 aa downstream          |
| W20                       | 4bp insertion, 1bp deletion, four mutations in 8 <sup>th</sup> exon | Pro>Gly, Gly>Trp substitutions, insertion of Ile |
| W29                       | 1bp deletion in 8 <sup>th</sup> exon                                | Frameshift, loss of stop codon                   |

**D**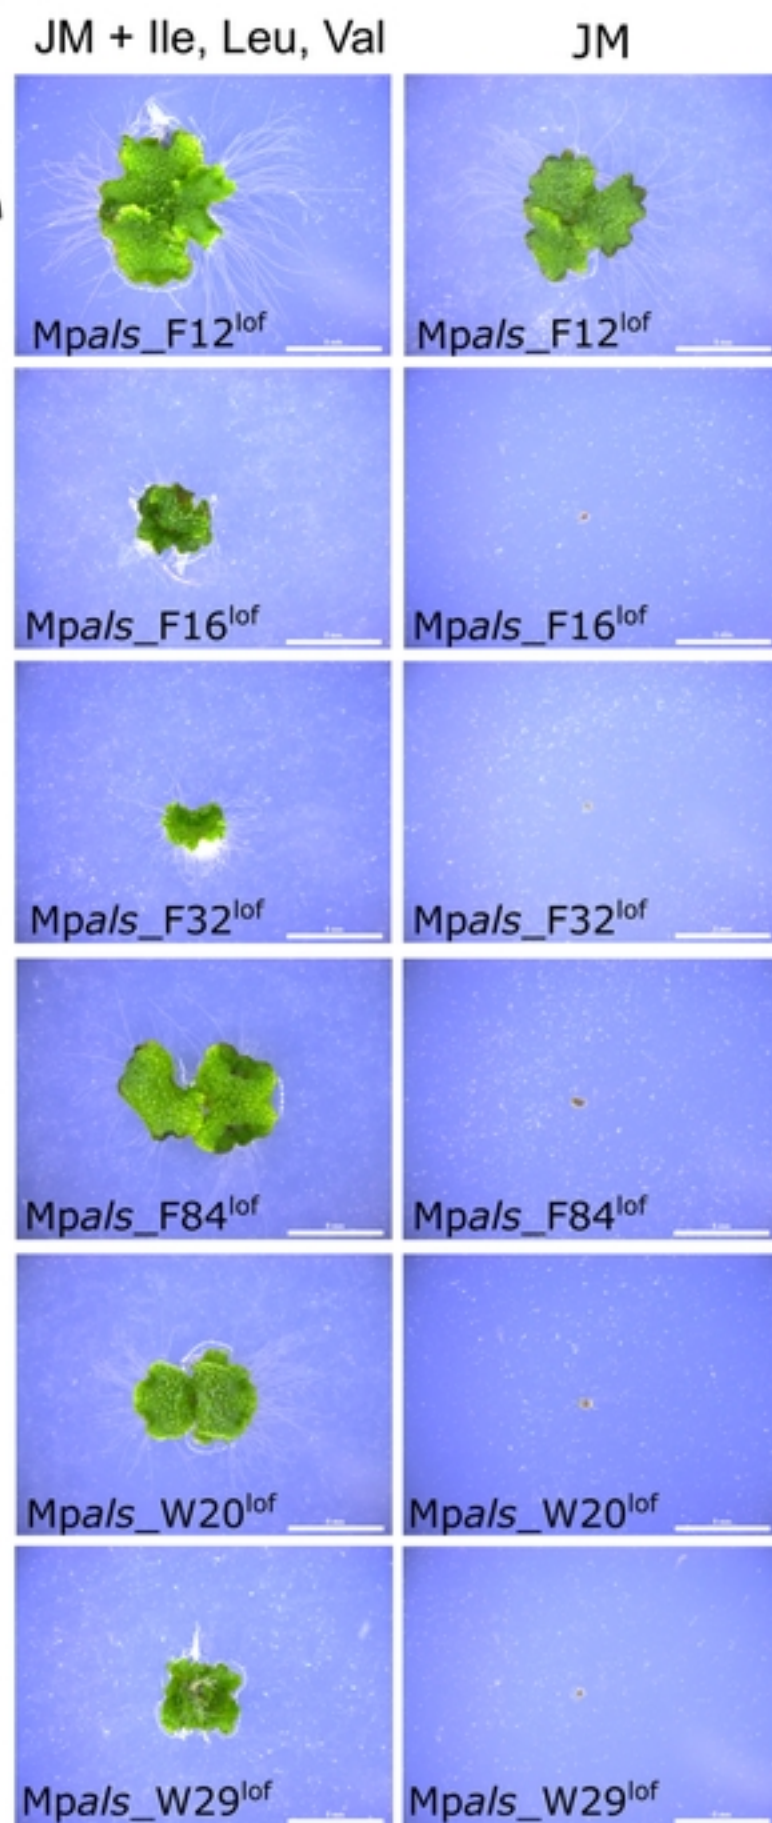

**A**

## Tak-2 CS Tr vs U

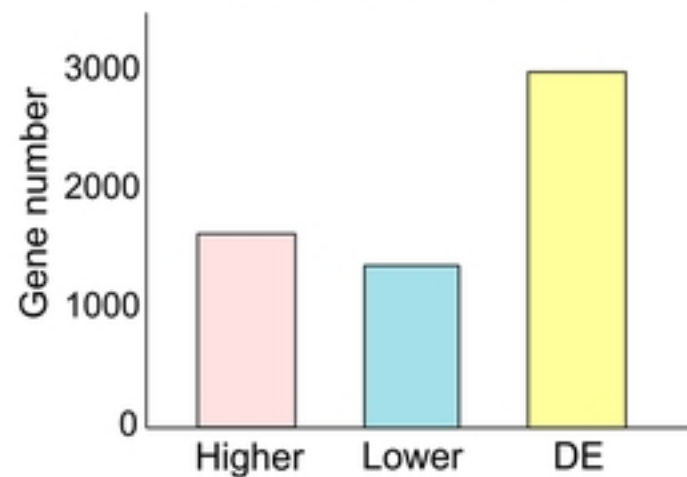**C**

## HILIC

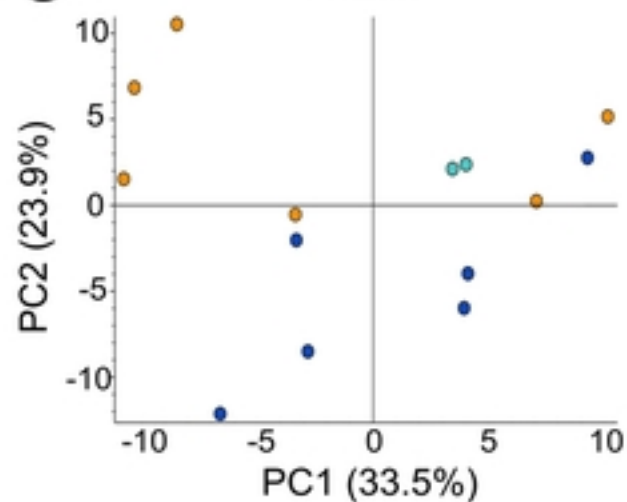**D**

## RP

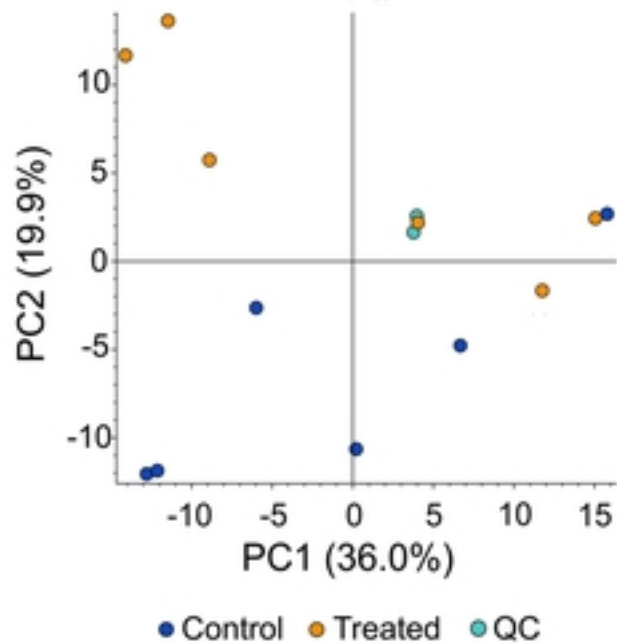**B**

Gene\_ratio Gene\_count

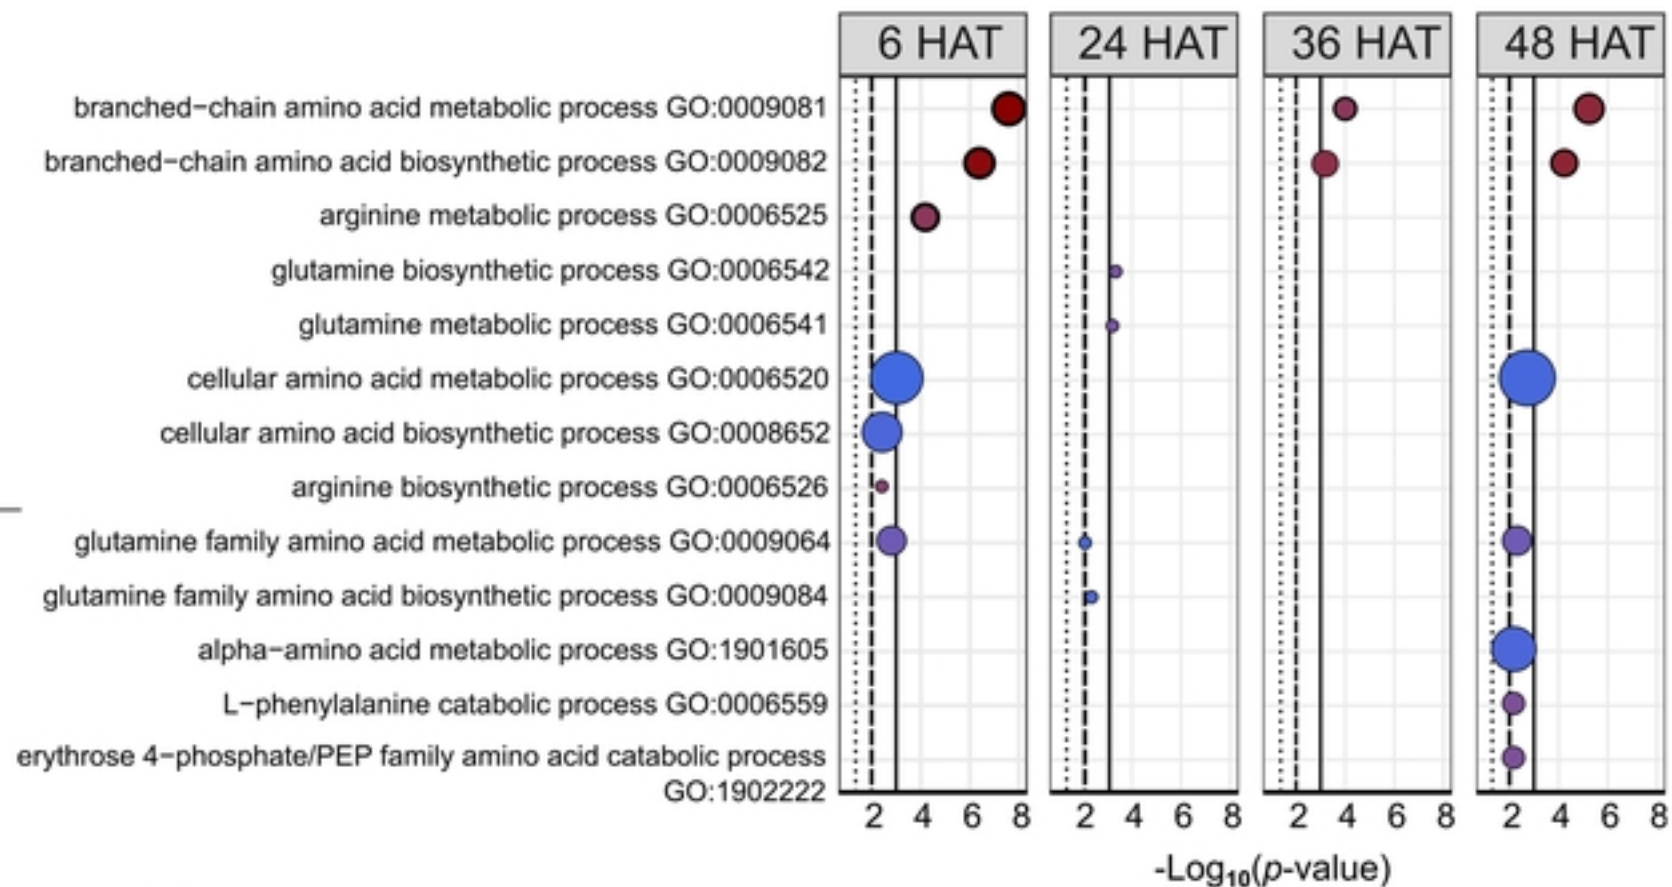**E**

## HILIC

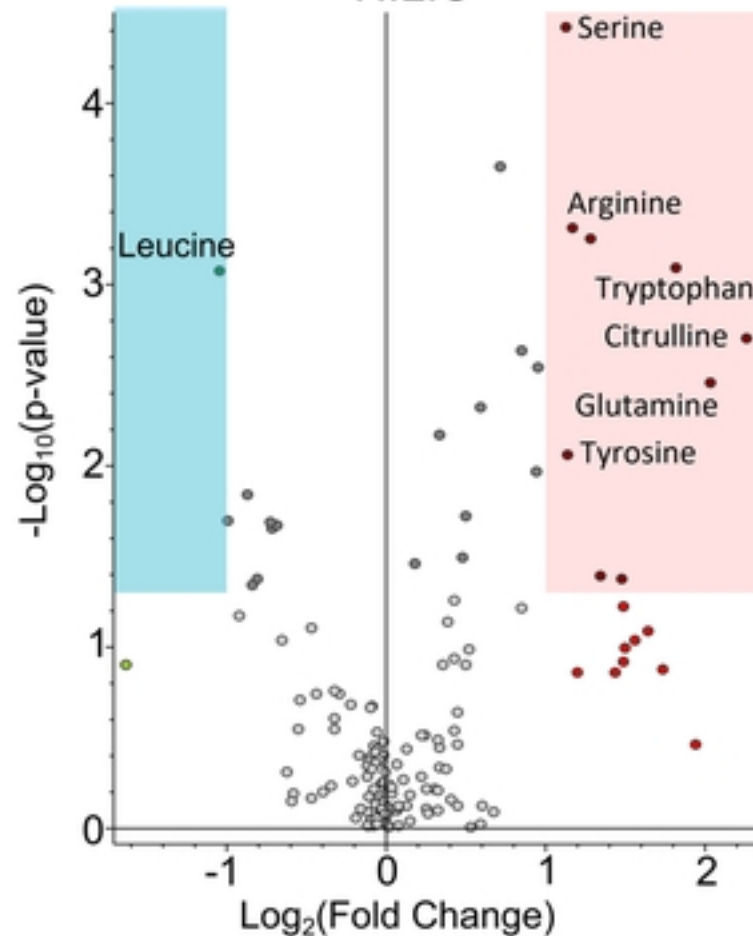**F**

## RP

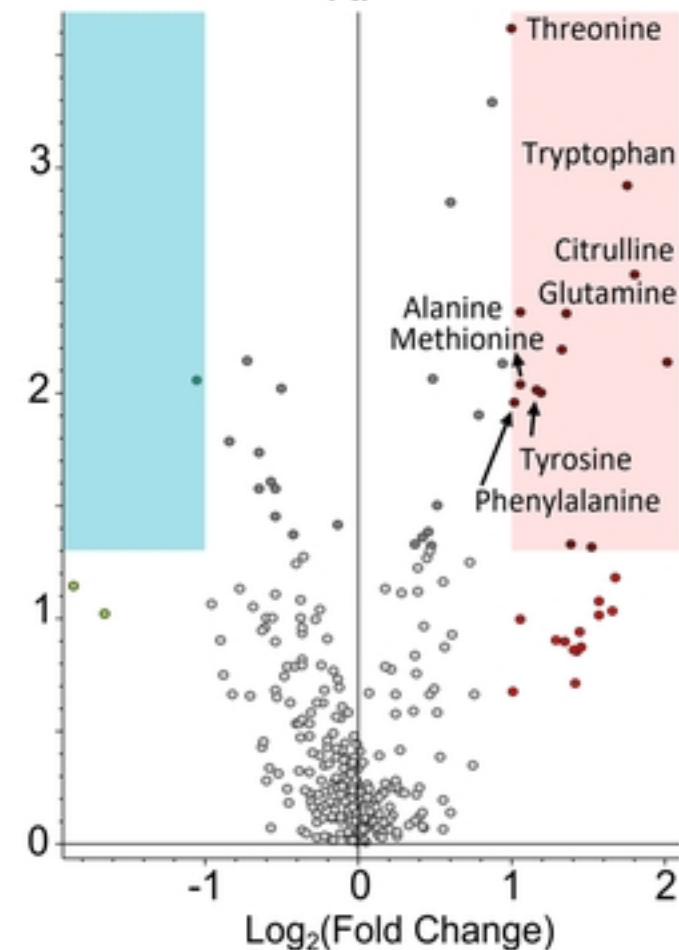



**A**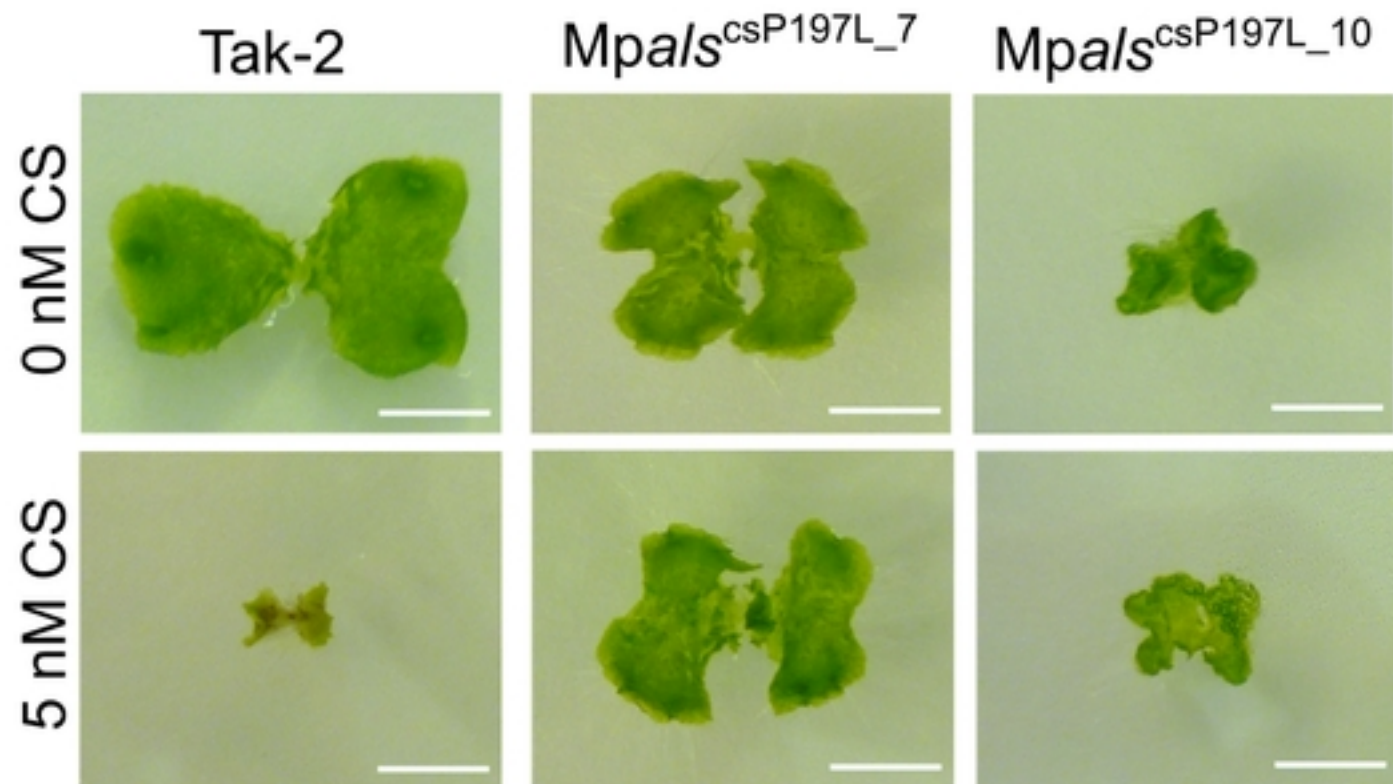**B**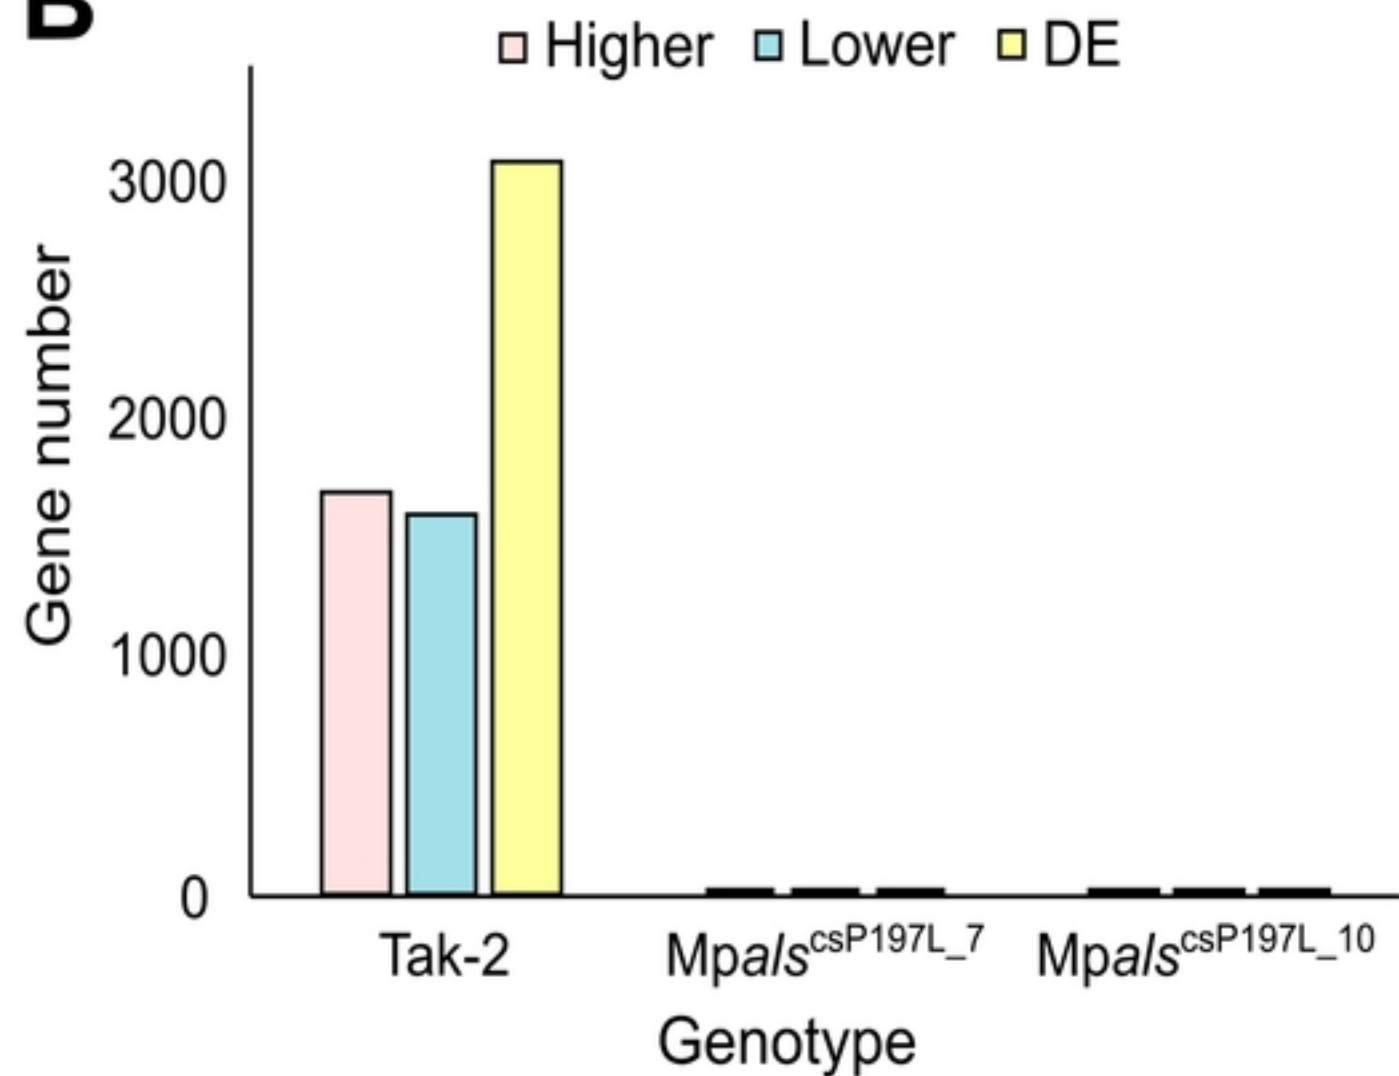**C**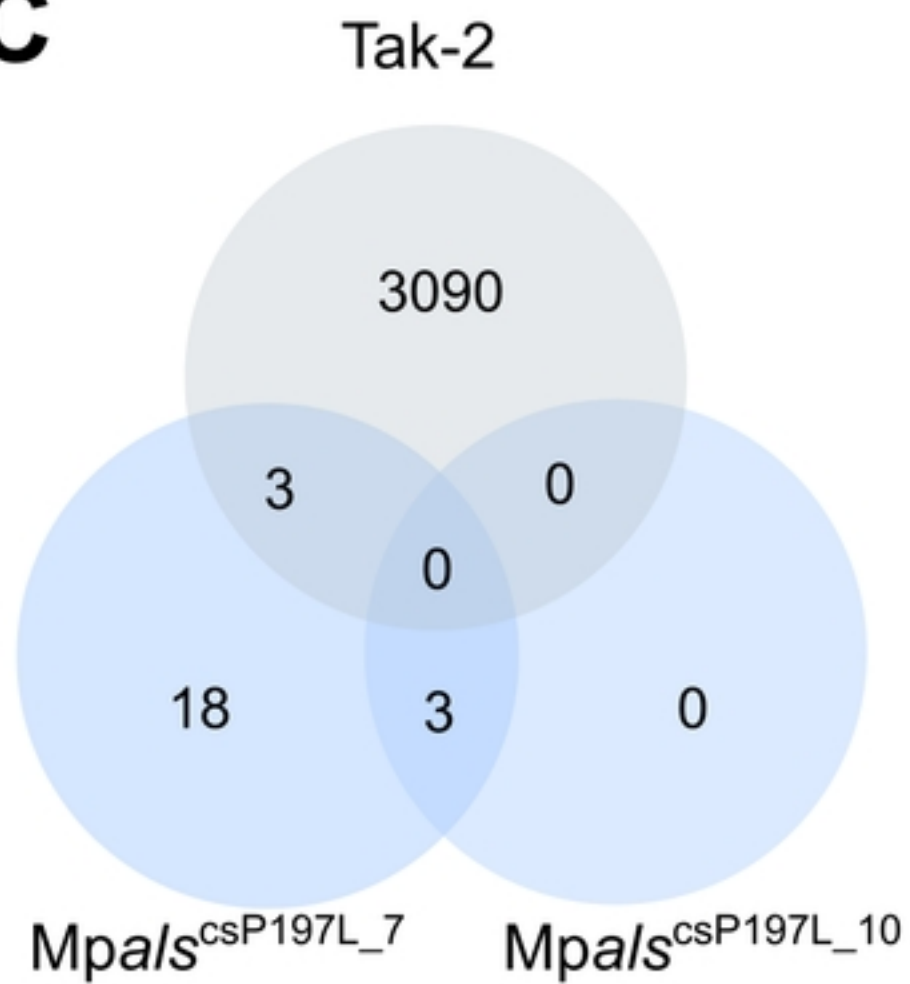

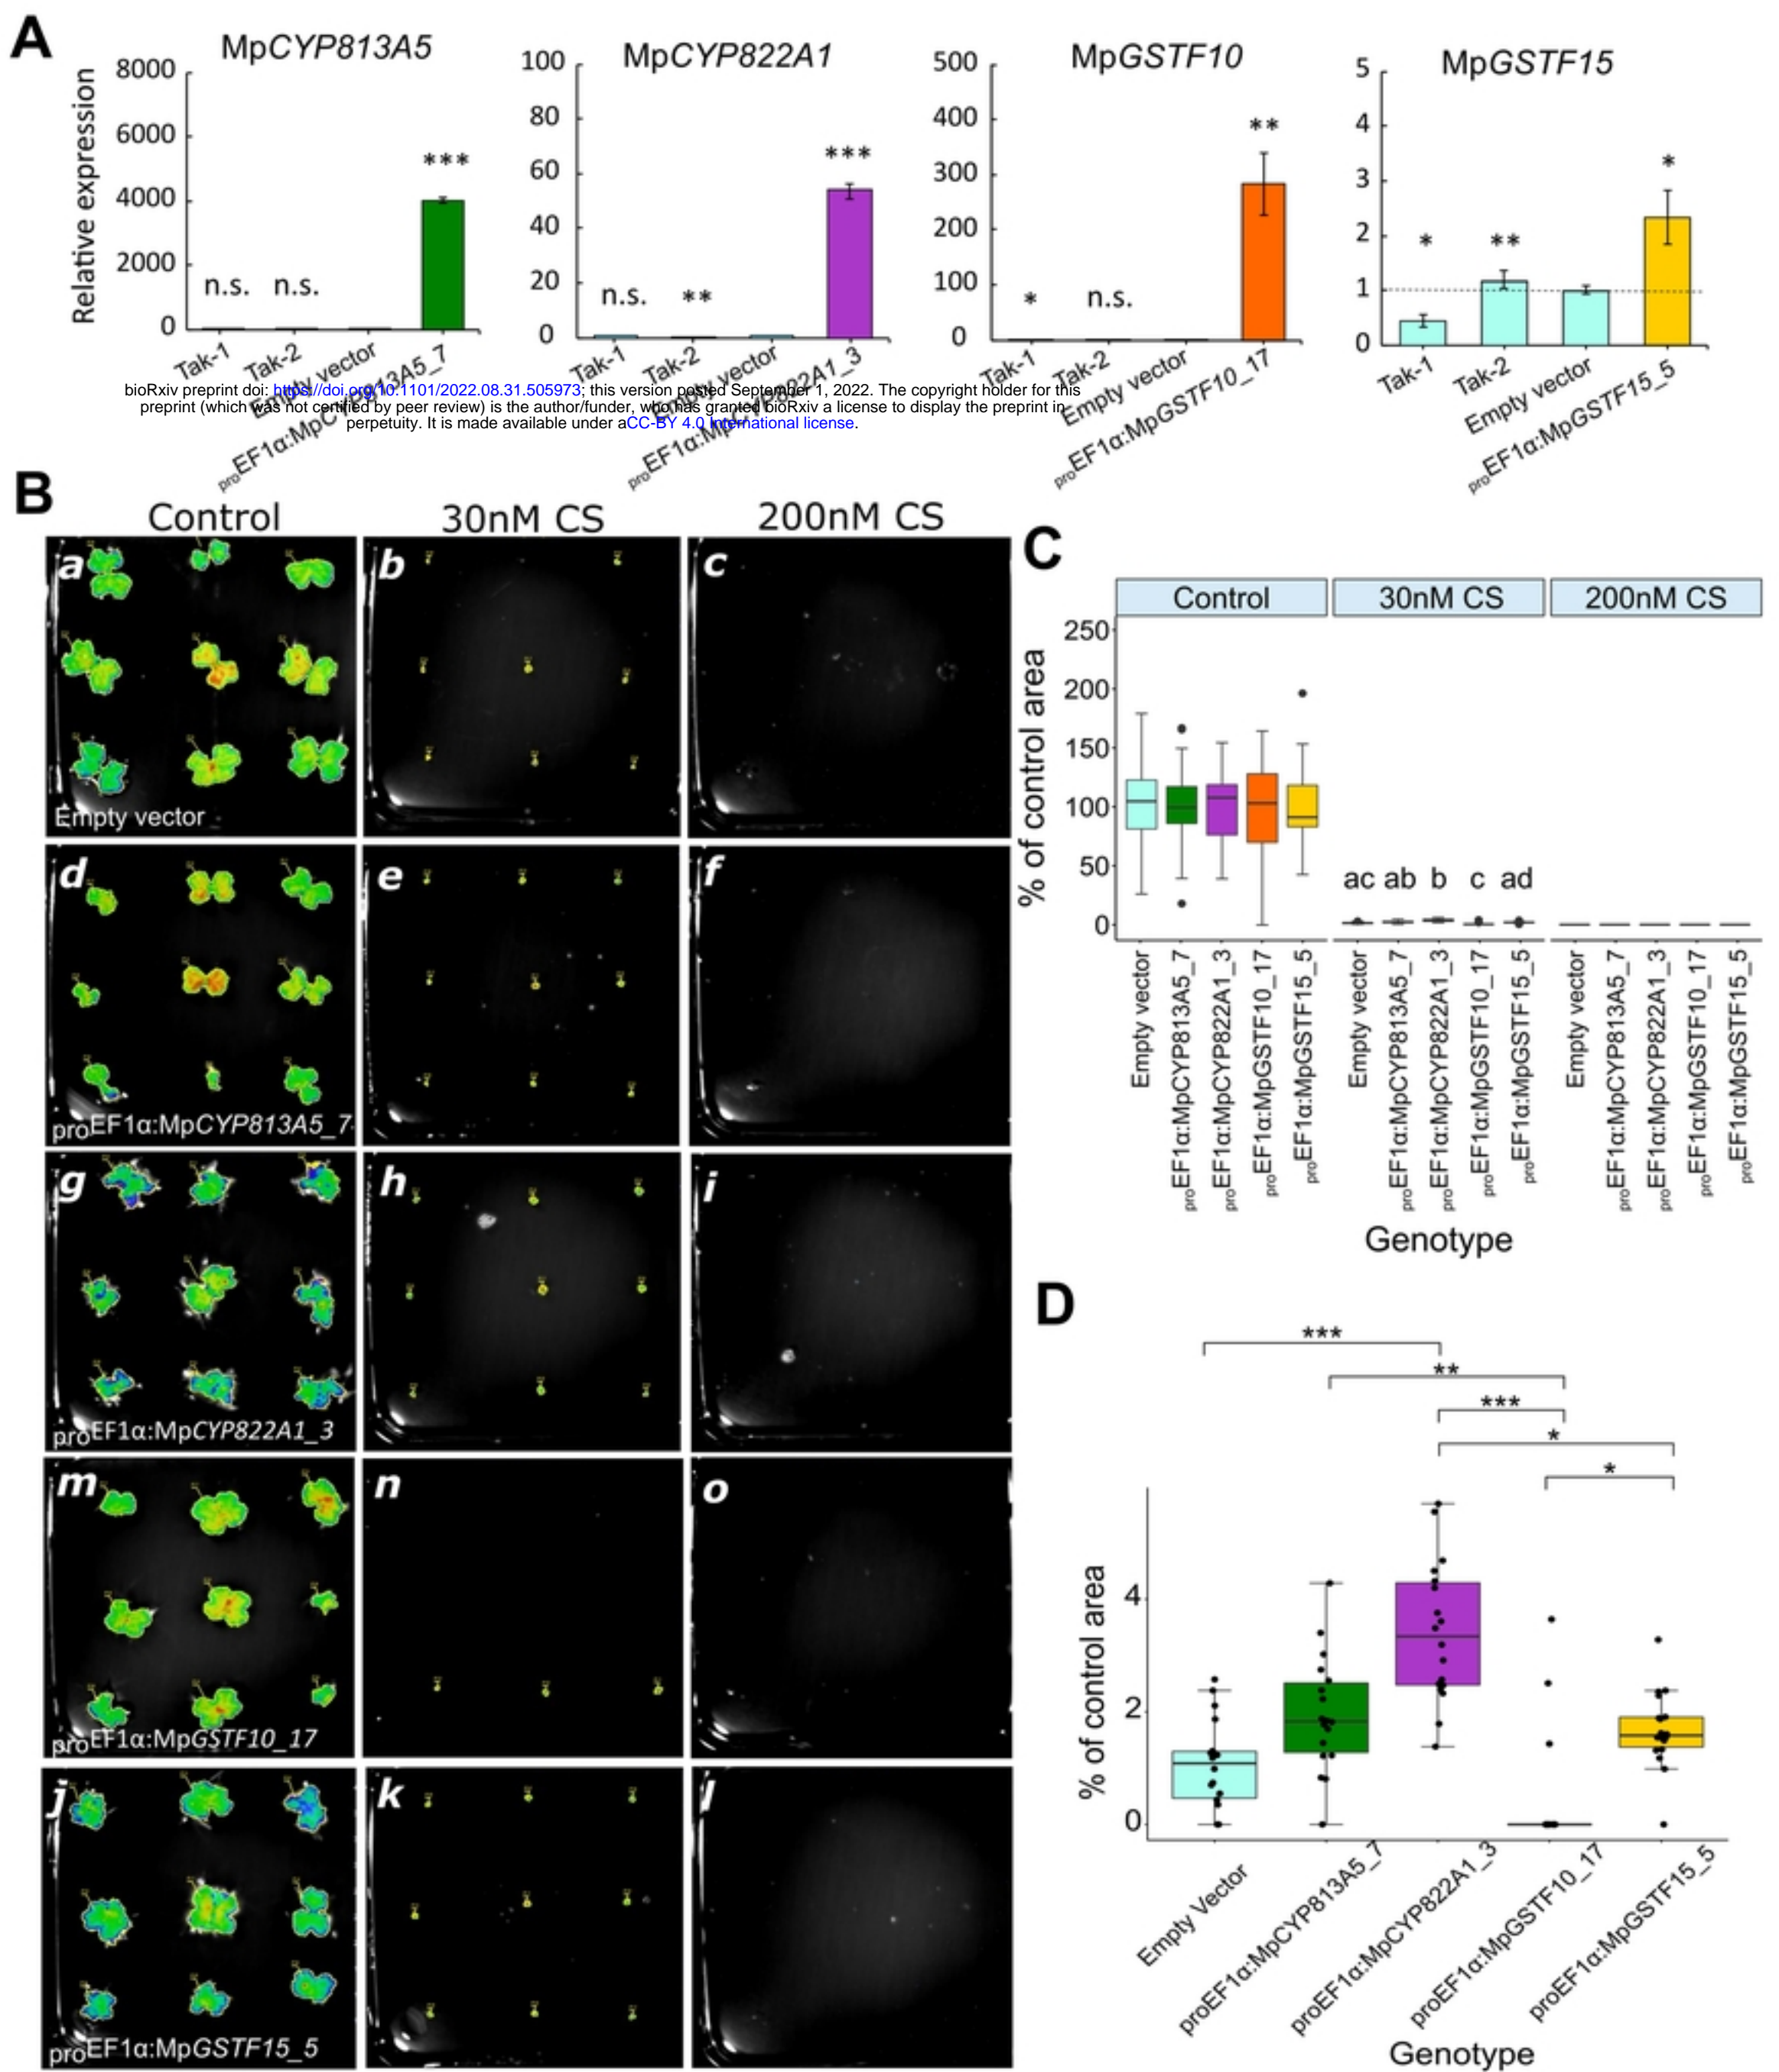

Source: http://biorxiv.org/content/10.1101/2022.08.31.505973v1.full.pdf
